# binomialRF: Scalable Feature Selection and Screening for Random Forests to Identify Biomarkers and Their Interactions

Samir Rachid Zaim<sup>1,3</sup>, Colleen Kenost<sup>1,3</sup>, Yves A. Lussier<sup>1,5,\*</sup>, Helen H. Zhang<sup>6,\*</sup>

<sup>1</sup>The Center for Biomedical Informatics & Biostatistics of the University of Arizona Health Sciences, 1230 N. Cherry Ave, Tucson, AZ, 85721, USA

<sup>2</sup>The Department of Medicine, College of Medicine, Tucson, 1501 N. Campbell Ave, Tucson, AZ, 85721, USA

<sup>3</sup>The Graduate Interdisciplinary Program in Statistics, 617 N. Santa Rita Ave. The University of Arizona, Tucson, AZ 85721, USA

<sup>4</sup>The Center for Applied Genetic and Genomic Medicine, 1295 N. Martin, Tucson, AZ 85721, USA

<sup>5</sup>The University of Arizona Cancer Center, 3838 N. Campbell Ave, Tucson, AZ 85721, USA

<sup>6</sup>The Department of Mathematics, College of Sciences, 617 N. Santa Rita Ave. The University of Arizona, Tucson, AZ 85721, USA

\* Correspondence

Corresponding Authors

YAL: [yves@email.arizona.edu](mailto:yves@email.arizona.edu)

HHZ: [hzhang@math.arizona.edu](mailto:hzhang@math.arizona.edu)

**Keywords:** random forests, feature selection, binomial, variable selection, R package

## Abstract

**Background:** Feature selection is becoming increasingly important in machine learning as users want more interpretation and post-hoc analyses. However, existing feature selection techniques in random forests are computationally intensive and high RAM memory requirements requiring specialized (uncommon) high throughput infrastructures. In bioinformatics, random forest classifiers are widely used as it is a flexible, self-regulating and self-contained machine learning algorithm that is robust to the “*predictors(features) P* >> *subjects N*” problem with minimal tuning parameters. The current feature selection options are used extensively for biomarker detection and discovery; however, they are limited to variants of permutation tests or heuristic rankings with arbitrary cutoffs. In this work, we propose a novel paradigm using the binomial framework for feature selection in random forests, *binomialRF*, which is designed to produce significance measures devoid of expensive and uninterpretable permutation tests. Furthermore, it offers a highly flexible framework for efficiently identifying and ranking multi-way interactions via dynamic tree programming.

**Methods:** We propose a novel and scalable feature selection technique that exploits the tree structure in the random forest, treats each tree as a binomial stochastic process, and determines feature significance by conducting a one-sided binomial exact test to determine if a feature was detected more often than expected by random chance. Since each tree is an independent and identically distributed random sample in a binomial process (from the perspective of choosing a splitting variable in the root node), the test statistic is constructed based on the frequency of a

44 feature being selected (each tree is a Bernoulli trial for selecting a feature), and then the features  
45 are ranked based on the observed test statistics, its resulting nominal p-values, and its  
46 multiplicity-adjusted q-values. Furthermore, the binomialRF framework provides a general  
47 selection framework to identify 2-way, 3-way, and  $K$ -way interactions by generalizing the test  
48 statistic to count sub-trees in the random forest using dynamic tree programming.

49 **Results:** In simulation studies, the binomialRF algorithm performs competitively with respect to  
50 the state of the art in terms of classification accuracy, true model coverage, and controlling for  
51 false selection in identifying main effects while attaining substantial computational performance  
52 gains (between 30 to 600 times faster in high dimensional settings than the state of the art). In  
53 addition, extending the binomialRF using model averaging identified the true model on average  
54 with greater accuracy (>20% improvement in reducing false positive feature selection at high  
55 dimensions while maximizing true model coverage) and attained greater classification accuracy  
56 (between 4-9% improvement across all techniques) without sacrificing computational speed (2<sup>nd</sup>  
57 fastest performance after binomialRF). In addition, the framework easily scales and extends to  
58 identifying 2-way and  $K$ -way interactions (i) without additional memory requirements (only  
59 requires storing original predictor matrix), and (ii) with minimal additional computational  
60 complexity cost due to efficient dynamic tree programming interaction searches. The algorithm  
61 was validated in a case study to predict bronchospasm-related hospitalization from blood  
62 transcriptomes where the binomialRF algorithm correctly identified the previously published  
63 relevant physiological pathways, presented comparable classification accuracy in a validation  
64 set, and extended previous work in this area by looking at pathway-pathway interaction.

65 **Conclusion:** The proposed binomialRF proposes a novel and efficient feature selection method  
66 devoid of permutation tests – that scales linearly in the number of trees, with minimal  
67 computational complexity, thus outperforming alternate conventional methods from a  
68 computational perspective while attaining competitive model selection and classification  
69 accuracies and enabling computations on common of cost-effective high throughput  
70 infrastructures. Furthermore, the binomialRF model averaging framework greatly improves the  
71 accuracy of the feature predictions, controlling for false selection and substantially improving  
72 model and classification accuracy. Validated in numerical studies and retrospectively in a  
73 clinical trial (case study), the binomialRF paradigm offers a binomial framework to detect  
74 feature significance and easily extends to search for  $K$ -way interactions in a linear fashion,  
75 reducing a known non-polynomial time exploration to linear approximations.

76 The binomialRF R package is freely available on GitHub and has been submitted to  
77 BioConductor, with all associated documentations and help files.

78  
79 Github: <https://github.com/SamirRachidZaim/binomialRF>

80 BioConductor: binomialRF

81

## 82 **1 Introduction**

83 Recent advances in machine learning and data science tools have led to a revamped effort for  
84 improving clinical decision-making anchored in genomic data analysis and biomarker detection.  
85 However, despite these novel advances, random forests (RFs) [1] remain a widely popular

86 machine learning algorithm choice in genomics given their ability to i) accurately predict  
 87 phenotypes using genomic data and ii) identify relevant genes and gene products used to predict  
 88 the phenotype. Literature over the past twenty years has demonstrated [2-9] their wide success in  
 89 being able to robustly handle the “ $P \gg N$ ” issue where there are more predictors or features “ $P$ ”  
 90 (i.e., genes) than there are human subjects “ $N$ ” while maintaining competitive predictive and  
 91 gene selection abilities.

92 However, the translational utility of random forests has not been fully understood as they are  
 93 often viewed as “black box” algorithms for physicians and geneticists. Therefore, a substantial  
 94 effort over the past decade has focused around “feature selection” in random forests [5, 6, 10-14]  
 95 in order to better provide explanatory power of these models and to identify important genes and  
 96 gene products in classification models. **Table 1** demonstrates the two major classes of feature  
 97 selection techniques: i) permutation-type measures of importance and ii) heuristic rankings  
 98 without formal decision boundaries (i.e., no p-values). The second and third columns in **Table 1**  
 99 indicate where each method falls. These feature selection techniques have been widely used in  
 100 biomarker discovery by the bioinformatics community as an alternative to classical statistical  
 101 techniques and have shown promising results in identifying single gene products. However, these  
 102 techniques do not easily scale computationally nor memory-wise for identifying molecular  
 103 interactions, limiting their translational utility in precision medicine. To meet this need, we  
 104 propose the *binomialRF* feature selection algorithm, a wrapper feature selection algorithm that  
 105 identifies significant genes and gene sets in a memory-efficient and scalable fashion. Building  
 106 from the ‘inclusion frequency’[15] heuristic feature ranking, binomialRF formalizes this concept  
 107 into a binomial probabilistic framework with measures of p-values and extends to identify gene  
 108 set interactions of any size. The main algorithm is presented in Section 2 while the extension to  
 109 identify interactions is presented in Section 3. A section on theoretical computational complexity  
 110 is presented in Section 4, while applications in numerical analyses and case studies evaluate its  
 111 utility in Sections 5 and 6. The discussion, limitations, and concluding sections are presented in  
 112 Sections 7-9.

113 **Table 1: Random forest Feature Selection Techniques.** As described, the proposed  
 114 binomialRF method is the only computationally-efficient feature selection technique  
 115 (permutation free) that also generates a p-value.

| Method            | P-value | Computational efficiency | Description                                                                                                                                                                                                                         |
|-------------------|---------|--------------------------|-------------------------------------------------------------------------------------------------------------------------------------------------------------------------------------------------------------------------------------|
| <b>RFE</b>        | No      | Yes                      | Iteratively trains Random Forest (RF) models and at each iteration, removes all features with 0 VI and train the subsequent RF with the remaining vars. Repeats until model convergence (i.e., no more features can be eliminated). |
| <b>VSURF[11]</b>  | No      | No (permutations)        | Two-step feature selection process: Step 1 determines 'important' features by permuting values of predictor and measuring change in error; Step 2 refines model by step-forward introduction until no further error reduction.      |
| <b>PIMP[14]</b>   | Yes     | No (permutations)        | Permutates outcome and determines a feature's importance based on increases in MI or Gini errors. The importance measure is then fit to a distribution to produce p-values for each feature.                                        |
| <b>Boruta[13]</b> | No      | Yes                      | Creates phony predictors by permuting the values of the shadow vars. Runs RF and collects Z-score on importance of                                                                                                                  |

|                                           |     |     |                                                                                                                                              |
|-------------------------------------------|-----|-----|----------------------------------------------------------------------------------------------------------------------------------------------|
|                                           |     |     | all vars. Eliminates features whose Z-score is less than max (Z-score shadow vars). Repeats until convergence.                               |
| <b>VarSelRF[5]</b>                        | No  | Yes | Iteratively removes worst .20 (or x-percentage) of all features; retrains RF; selects smallest feature set within 1se of best model.         |
| <b>binomialRF</b><br>“current manuscript” | Yes | Yes | Performs Binomial feature selection test to identify whether a model selects a predictor more likely than what is expected by random chance. |

116

## 117 2 binomialRF: Identifying main effects

### 118 2.1 Problem Set-up and Notation

119 The binomialRF algorithm is a feature selection algorithm designed to develop classifiers in  
 120 genomics datasets. Datasets are noted as  $X$  and are comprised of  $N$  subjects (usually  $< 1,000$ )  
 121 and  $P$  genes in the genome (usually  $P > 20,000$  expressed genes). Genomics data represent the  
 122 traditional “high-dimensional” setting where there are many more features than there are samples  
 123 (e.g., “ $P \gg N$ ”). In binary classification settings, the outcome variable  $Y$ , differentiates the  
 124 case and control groups (i.e., “healthy” vs. “tumor” tissue samples).

125

126 In linear and generalized linear models (hereinafter termed “linear models”), there is a major  
 127 assumption of linearity (in coefficients) in which either  $E[Y|X] = X\beta$  or  $E[Y|X] = g(X\beta)$ ,  
 128 where the  $E$  operator denotes the “expected value” and  $g$  is a link function (e.g., logistic or  
 129 probit for binomial regression), and  $\beta$  is a coefficient vector. Linearity assumptions are often  
 130 inflexible and many times unjustified, resulting in suboptimal classification performance.  
 131 Furthermore, linear models offer restrictive results when performing feature selection in the  
 132 presence of high-dimensional data (“ $P \gg N$ ”) since linear models saturate at  $P = N$ , rendering  
 133 powerful algorithms such as the LASSO[16] and elastic net [17] ineffective as they cannot  
 134 identify additional features (genes) after saturation. In other words, if a genomics classifier  
 135 requires a 1,000 gene signature to effectively predict classes, but there are only 100 subjects in  
 136 the study, the LASSO and elastic net will at most select 100 genes out of the 1,000 gene  
 137 signature, effectively missing the remaining 900. Similar limitations occur for other penalized  
 138 regression strategies like the group LASSO[18].

139

140 These two major limitations led many bioinformaticians to consider powerful, model-free  
 141 machine learning algorithms such as random forests (RF)[1] to analyze genomics datasets for  
 142 developing classifiers and identifying gene-product biomarkers. Trees and random forest require  
 143 minimal assumptions and can robustly handle high-dimensional data since they do not require  
 144 any full column rank and other matrix regularity conditions in linear models. RF are collections  
 145 of randomized decision trees, where for each decision tree,  $T_z$ , in the RF, a subset of the data and  
 146 of the features are selected. This randomization encourages a diverse set of trees and allows each  
 147 individual tree to make predictions across a variety of features and subjects. The induced  
 148 diversity in the RF model strengthens the overall classifier and mitigates overfitting. Specifically,

149 each tree only sees  $m < P$ <sup>i</sup> features in the root when it determines the first optimal feature for  
 150 splitting the data into two subgroups. Alternatively, one can re-parameterize the feature  
 151 subsampling with parameter  $s$  ( $s \in (0,1)$ ), which determines what percentage of  $P$  is seen by each  
 152 tree. Letting  $F_{j,z}$  denote the random variable measuring whether  $X_j$  is selected as the splitting  
 153 variable for the root at tree  $T_i$ ,

$$F_{j,z} = \begin{cases} 1, & \text{if } \text{root}(T_i) = X_j \\ 0, & \text{otherwise.} \end{cases} \quad (1)$$

155  
 156 This results in  $F_{j,z}$  being a Bernoulli random variable,  $F_{j,z} \sim \text{Bern}(p_{\text{root}})$ , and  $F_j = \sum_{z=1}^V F_{j,z} \sim$   
 157  $\text{Binomial}(V, p_{\text{root}})$  being a Binomial random variable across all  $V$  trees, where  $p_{\text{root}}$  is the  
 158 probability of randomly selecting a feature  $X_j$  as the optimal splitting variable in the root of tree  
 159  $T_i$ . Under the null,  $p_{\text{root}}$  is constant across all trees. **Table 2** details the notation that will be used  
 160 throughout this study.

161

162 **Table 2: Description of mathematical notation.**

| Notation                           | Description                                                                                                                                             |
|------------------------------------|---------------------------------------------------------------------------------------------------------------------------------------------------------|
| $\beta$                            | coefficient vector                                                                                                                                      |
| $g, k$                             | Indices in product term                                                                                                                                 |
| $H_0, H_A$                         | “Null” and “Alternative” hypotheses, respectively.                                                                                                      |
| $K$                                | Integer denoting the interaction depth                                                                                                                  |
| $L$                                | Number of candidate models in binomialRF model averaging                                                                                                |
| $m$                                | User parameter to limit the number of features in a tree. <b><math>m</math> is constant for all trees</b>                                               |
| model <sub><math>j</math></sub>    | Candidate model in the binomialRF model averaging                                                                                                       |
| $N$                                | Positive integer denoting the number of samples or subjects                                                                                             |
| $O(\cdot)$                         | Big “O” operator, used to denote an algorithm’s computational complexity. ( $O(N^2)$ for example, denotes an algorithm that is quadratic in $N$ .)      |
| $p_{\text{root}}(P, m)$            | Probability of randomly selecting a feature $X_j$ as the optimal splitting variable in the root of a tree. It is a function that depends on $P$ and $m$ |
| $p_{K\text{-way}}$                 | Probability of randomly selecting a set of $K$ features $\{X_j\}_{j=1}^K$ as the optimal splitting sequence starting at the root of a tree              |
| $P$                                | Positive integer indicating the number of measured or expressed genes in a genomics dataset                                                             |
| $RF = \{T_1, \dots, T_V\}$         | Random forest grown with $V$ distinct individual decision trees                                                                                         |
| $s$                                | Proportion of features subsampled. $s = \frac{m}{P}$ . <b><math>s</math> is constant for all trees</b>                                                  |
| Selected <sub><math>j</math></sub> | Selected features by model <sub><math>j</math></sub> in binomialRF model averaging                                                                      |
| $T_z$                              | Decision tree. Specifically, the $z^{\text{th}}$ tree in a random forest                                                                                |
| $V$                                | User parameter to determine the number of trees in a random forest                                                                                      |
| $X_{N \times P}$                   | Genomics design matrix with $N$ samples and $P$ features. Also known as $X$                                                                             |
| $X_j$                              | Vector that denotes the $j^{\text{th}}$ feature (or gene) in $X_{N \times P}$                                                                           |

<sup>i</sup> The parameter,  $m$ , is a user-determined input in the random forest algorithm with default values set usually to either  $m = \sqrt{P}$  or  $m = \frac{P}{3}$ .

|                   |                                                                     |
|-------------------|---------------------------------------------------------------------|
| $\{X_j\}_{j=1}^K$ | Sequence of $K$ consecutive splitting features starting at the root |
| $X_i \otimes X_j$ | Interaction between the $i^{th}$ and $j^{th}$ feature               |
| $\otimes X_i^K$   | Interaction of $K$ different features, for $K \geq 3$               |
| $Y_{1 \times N}$  | Vector of binary class labels. Alternatively referred to as $Y$     |

163

## 164 2.2 High-level overview and background

165 The proposed binomialRF R package is a software that contains a novel feature selection  
166 technique for random forests, which wraps around the existing randomForest R package[19].  
167 Since random forests (RFs) use bootstrap sampling, feature subsetting, and aggregating to create  
168 a robust ensemble classifier from individual weak learners, the algorithm essentially averages  
169 results from a set of trees to form predictions and provide heuristic feature importance rankings.  
170 With a minimal number of tuning parameters and hyperparameters, RFs are essentially a self-  
171 regulating and self-sufficient machine learning algorithm. The binomialRF algorithm builds  
172 upon the random forest algorithm to exploit its binary-split tree structure to select important  
173 features. It treats each tree in the RF as a stochastic binomial process and develops a hypothesis-  
174 test-based feature selection criterion for random forests, resulting in a rigorous p-value ranking  
175 for feature selection. There are a number of existing feature selection algorithms in random  
176 forest algorithms (see **Table 1**) that measure “variable importance” based on permutation tests or  
177 heuristic rankings. In this work, we provide an alternative for measuring importance devoid of  
178 permutations and heuristic rankings by introducing a binomial hypothesis test into the feature  
179 selection process. To the best of our knowledge, this is the first feature selection algorithm in  
180 random forests that implements a binomial framework, can provide a relative significance  
181 measure without using permutation tests, and naturally scales to screen for interactions in a fast  
182 and memory-efficient way. We explain in the subsequent sections the components of the  
183 binomialRF algorithm.

184

185 The binomialRF R package is freely available on GitHub and has been submitted to  
186 BioConductor, with all associated documentations and help files.

187

188 Github: <https://github.com/SamirRachidZaim/binomialRF>

189 BioConductor: binomialRF

## 190 2.3 Optimal splitting variables and decision trees

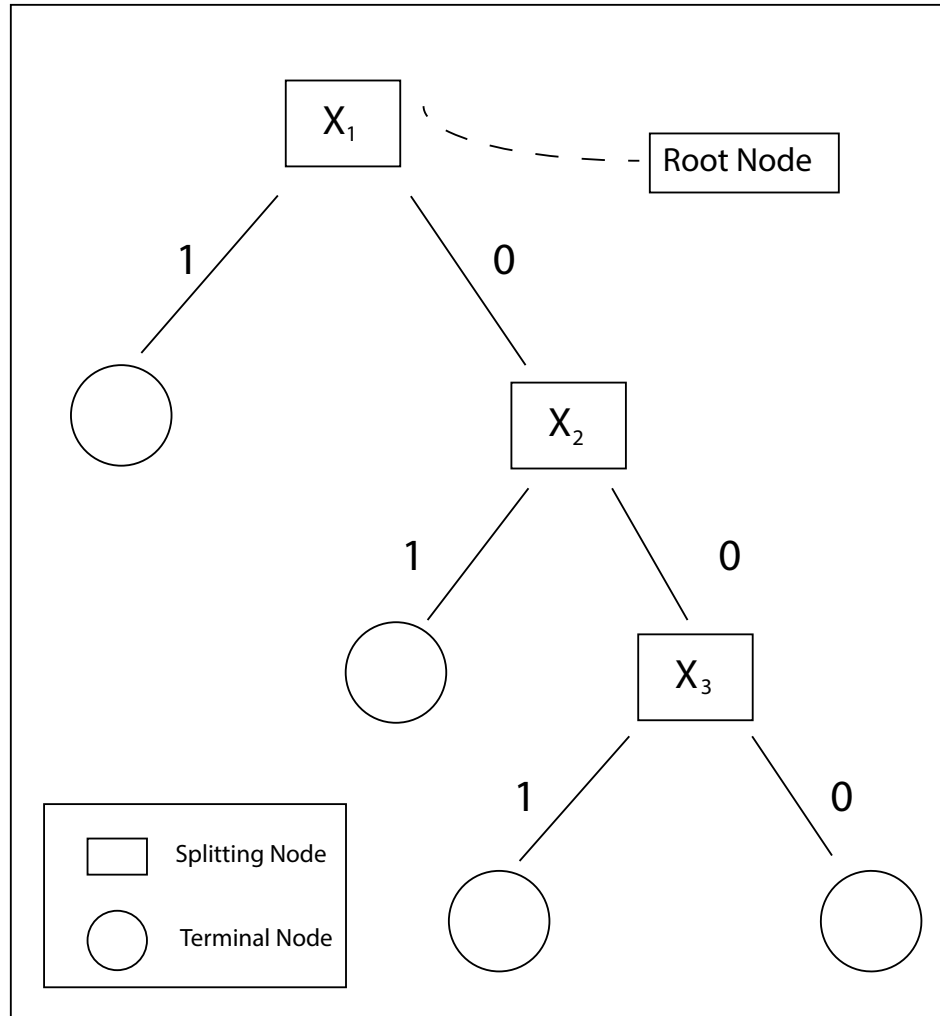

191 **Fig. 1. Decision tree.** In a binary split decision tree where  $X_1$  is the optimal splitting feature at  
 192 the root of the tree, and  $\{X_j\}_{j=1}^3 = \{X_1, X_2, X_3\}$  is the optimal splitting sequence that indicates a  
 193 potential  $X_1 \otimes X_2 \otimes X_3$  3-way interaction (alternatively denoted as  $\otimes X_{j=1}^3$ ).  
 194

195 Consider a decision tree,  $T_z$ , in a random forest. At the top-most “root” node,  $m$ , features are  
 196 randomly subsampled from the entire space of  $P$  features. These  $m$  features are all tested as  
 197 possible splitting variables for the tree, and the optimal splitting variable,  $X_{optimal}$ , is selected as  
 198 the feature  $X_j$  that best separates the two classes and provides the best information gain.  
 199 Formally, this is stated in **Equation 2**.  
 200

$$X_{optimal} = \operatorname{argmax}_{X_j}(\text{Information Gain}) \quad (2)$$

201 Starting from the root, each node either selects its  $X_{optimal}$  or becomes a terminal node as seen in  
 202 **Figure 1**, where in the root,  $X_{optimal} = X_1$  and in the subsequent right daughter nodes,  
 203  $X_{optimal} = X_2, X_3$ .  
 204

205  
 206 If we focus solely at the root, then under a null hypothesis, each feature has the same probability  
 207 of being selected as the optimal root splitting feature, denoted by  $p_{root} = \Pr(X_{optimal} =$   
 208  $X_j) \forall j \in \{1, \dots, P\}$ . The random variable  $F_{j,z}$  (shown in **Equation 1**) is an indicator variable that  
 209 measures if  $X_j$  is selected as the optimal variable for the root at tree  $T_z$ .  $F_{j,z}$  is a Bernoulli random  
 210 variable,  $F_{j,z} \sim \text{Bern}(p_{root})$ . Summing across all the trees in the random forest,  $\mathbf{RF} =$   
 211  $(T_1, \dots, T_N)$ ,  $F_j = \sum_{z=1}^V F_{j,z} \sim \text{Binomial}(V, p_{root})$  is a Binomial random variable across all  $V$   
 212 trees, where  $p_{root}$  is the probability of randomly selecting a feature  $X_j$  as the optimal splitting  
 213 variable in the root of tree  $T_z$ .

## 214 2.4 Calculating $p_{root}$ and the binomial exact test for significance

215 Let  $T_z$  represent an individual tree grown in a random forest. Then,  $\mathbf{RF} = (T_1, \dots, T_N)$  denotes  
 216 the random forest (i.e., the collection of independently and identically distributed trees). If at  
 217 each  $T_z$ ,  $m < P$  features are subsampled to reduce the feature subspace at each tree, then the  
 218 probability,  $p_{root}$ , of  $X_j$  being selected by a tree,  $T_z$ , is shown in **Equation 3**:  
 219

$$p_{root} = 1 - \left( \prod_{g=1}^m \frac{P-g}{P-(g-1)} \left( \frac{1}{m} \right) \right) \quad (3)$$

220  
 221 Since features are selected without replacement in the subsampling process,  $\prod_{g=1}^m \frac{P-g}{P-(g-1)} \left( \frac{1}{m} \right)$  is  
 222 the probability of not selecting it, and using the complement rule, we get  $P(A) = 1 - P(\neg A)$ . Using  
 223 Equation 3, we can provide a formal measure of significance (i.e., a p-value) regarding if  $X_j$  was  
 224 selected more than expected by chance by determining if its frequency of selection exceeds a  
 225 statistical threshold. If we are concerned with only conducting a single hypothesis test about  
 226 predictor  $X_j$  using a significance level  $\alpha$ , then we conclude that  $X_j$  is chosen more often than by  
 227 random chance if  $F_j$  exceeds the critical value  $Q_{\alpha, K, p}$ , resulting in a one-sided hypothesis test  
 228 (shown in **Equations 4a-c**). Formally:  
 229

230 binomialRF Feature Selection Hypothesis Test

$$H_0: \Pr(X_j) \leq p_{root} \quad H_A: \Pr(X_j) > p_{root} \quad \text{Hypothesis Test} \quad (4\text{-a})$$

$$F_j = \sum_{i=1}^V F_{j,z} \sim \text{Binomial}(V, p_{root}) \quad \text{Test Statistic} \quad (4\text{-b})$$

$$R = \{X_j: F_j < Q_{\alpha, V, p_{root}}\} \quad \text{Rejection Region} \quad (4\text{-c})$$

232  
 233 Furthermore, since we are conducting simultaneous hypothesis tests when assessing the  
 234 significance of each feature, we must adjust for multiplicity. Using false discovery rate  
 235 adjustment procedures, such as Benjamini-Hochberg(BH)[20] or Benjamini- Yekutieli (BY)[21]  
 236 or Bonferroni family-wise, error rates can all be used depending on the predictor space, though a  
 237 safe option is always given that it provides a false-discovery-adjusted p-value in the case of  
 238 dependent predictors.

## 239 2.5 The binomialRF algorithm



240 Combining methods of Sections 2.3 and 2.4, the binomialRF feature selection algorithm  
 241 constructs a formal hypothesis test to determine whether  $X_j$  is an important feature or not. It first  
 242 calculates the probability of selecting  $X_j$  as  $X_{optimal}$  a tree and the test statistic  $F_j = \sum_{T_i \in T} F_{j,z}$ . It  
 243 conducts a hypothesis test comparing the observed test statistics  $F_j$  for all features  $X_j$ , and its  
 244 expected value, yielding a p-value for each feature. Finally, it returns a feature selection ranking  
 245 with p-values and FDR-corrected q-values denoting variable importance. In other words, the  
 246 binomialRF ranks and assigns p-values to features based on how frequently they were the  
 247 optimal splitting variable in the tree. By restricting the search to the root of each tree, it allows  
 248 for modeling it via a binomial hypothesis testing framework. This procedure is illustrated in  
 249 **Figure 2** and formalized in **Algorithm 1** (Appendix A1).  
 250

## binomialRF Algorithm for Feature Selection

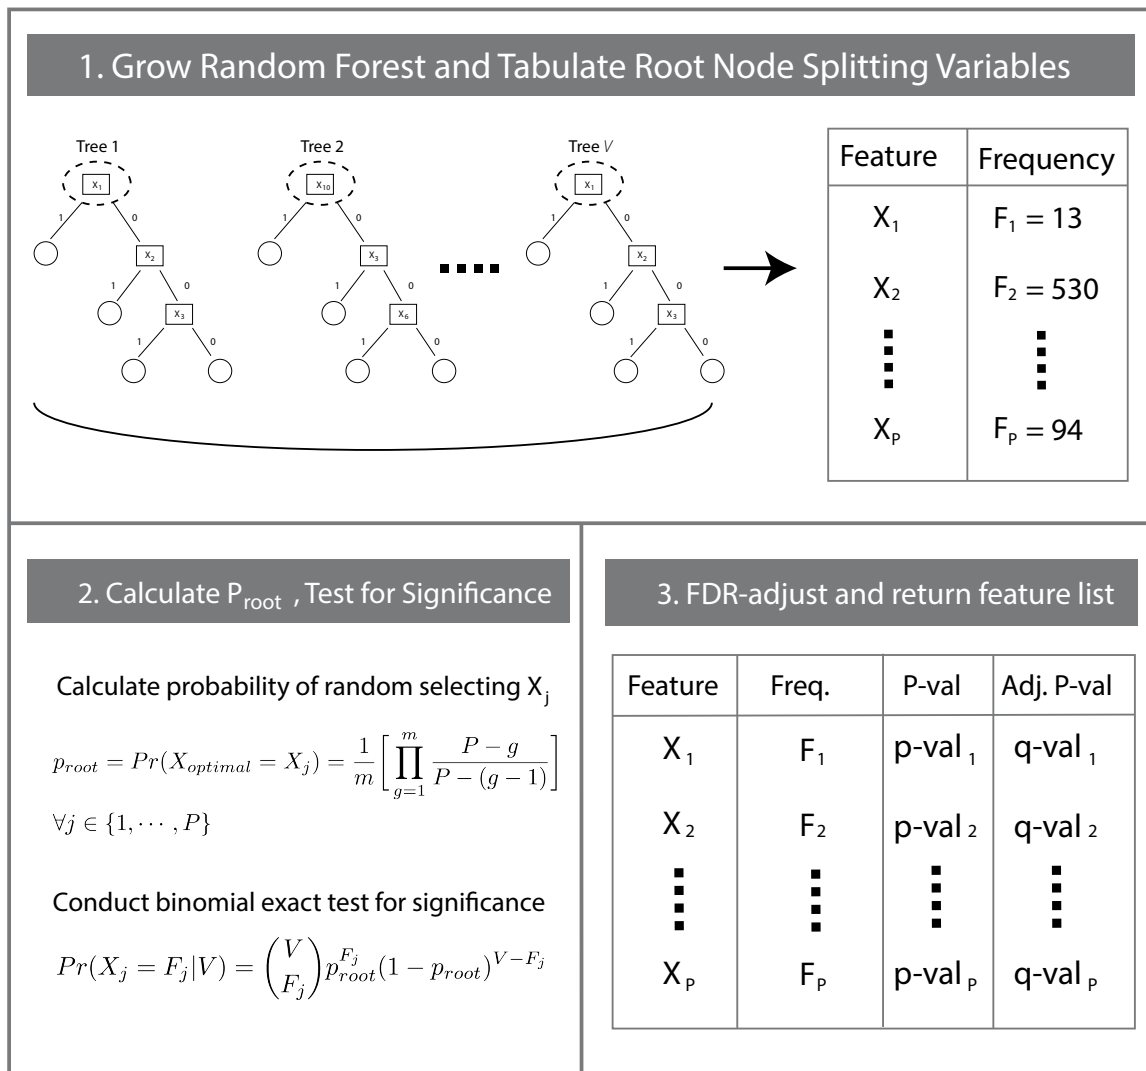

251 **Fig. 2. The binomialRF algorithm.** The binomialRF algorithm is a feature selection technique  
252 in random forests (RF) that treats each tree as a stochastic binomial process and determines  
253 whether a feature is selected more often than by random chance as the optimal splitting variable,  
254 using a top-bottom sampling without replacement scheme. The main effects algorithm identifies  
255 whether the optimal splitting variables at the root of each tree are selected at random or whether  
256 certain features are selected with significantly higher frequencies, and the interaction-screening  
257 extension is detailed in Section 3. **Legend:**  $T_z = z^{th}$  tree in random forest;  $X_j =$  feature  $j$ ;  $F_j =$   
258 observed frequency of selecting  $X_j$ ;  $Pr =$  probability;  $P =$  number of features;  $V =$  number of  
259 trees;  $m =$  user parameter to limit the number of features;  $g =$  index of the product.

## 260 **2.6 Cross-validated binomialRF**

261 Since the binomial exact test is contingent on a test statistic measuring the likelihood of selecting  
262 a feature and if there is a single dominant feature, it will render all remaining ‘important’  
263 features useless as they will always be selected as the splitting variable. Letting  $s$  represent the  
264 percent\_feature parameter, it is used to determine how many features are considered at each  
265 node. Features may be collinear or some dominant features may overshadow other important  
266 features. If  $s$  is too small, there will be minimal competition among features, allowing noisy ones  
267 to be deemed important, and if  $s$  is too large, dominant features will always overshadow  
268 important but small-signal features. Therefore, it is important to test a number of possible values  
269 of  $s \in (0,1)$  and optimize it via cross-validation. An extension to the binomialRF has been  
270 written to conduct a [default] 5-cross-validation<sup>ii</sup> to tune and identify the optimal  $s$  hyper-  
271 parameter.

## 272 **2.7 binomialRF Model Averaging: A tool for final model selection**

273 Model averaging is an alternative way to perform model selection by combining different models  
274 based on their performance and feature selection. In particular, assume that there are  $L$  different  
275 candidate models,  $model_1, model_2, \dots, model_L$ , that may contain the full true model structure, a  
276 subset of the truly important terms, or even none of the significant variables. We can implement  
277 binomialRF under each model,  $model_a$ , and identify important terms under each model; denote  
278 the selected set by  $Selected_1$ , under  $model_1$ . Then one can define an importance metric called  
279 “Proportion Selected” – see **Equation 5** – to measure how often a given feature  $X_j$  was selected.  
280 Formally, the proportion selected metric is defined as

$$281 \text{Proportion Selected } (X_j) = \sum_{i=1}^L I[X_j \in \text{Selected}_i] \quad (5)$$

282 where  $I$  is the indicator function measuring if  $X_j$  was selected by  $model_i$ . If Proportion Selected  
283  $(X_j)$  is equal to 1, then that feature is determined important by every single possible candidate  
284 model; however, if it equals 0, then every possible candidate model rejected it.

285  
286 In **Figure 3**, we use a simple toy example to illustrate the power of model averaging under  
287 binomialRF. As shown in **Figure 3A**, consider a dataset where the design matrix  $X$  contains 10  
288 predictors, of which the first 5 are related to the binary class label,  $Y$ , and the last 5 are noise.

---

<sup>ii</sup> 5-fold is the default but a user-modifiable parameter in the algorithm.

289 Suppose that you do not know what the true features are, so you consider a set of 10 possible  
290 candidate models (**Figure 3B**) to choose which is the most likely set of ‘significant’ features.  
291 Each of the proposed candidate models ( $\text{model}_1, \text{model}_2, \dots, \text{model}_{L=10}$ ) is ran as shown by the  
292 top bars (in black and white in **Figure 3B**), and determine their selections ( $\text{Selected}_1,$   
293  $\text{Selected}_2, \dots, \text{Selected}_{L=10}$ ) as shown by the bottom bars (in green and purple in **Figure 3B**).  
294 Then, to validate whether a feature is truly important, a model average is obtained by calculating  
295 the Proportion Selected ( $X_j$ ) metric for all possible features and rank them by their Proportion  
296 Selected value (**Figure 3C**). Using Proportion Selected  $> 0.5$  as a cutoff, we would conclude that  
297  $X_1, X_2, X_3, X_4, X_5$  are all significant while the remaining features can be discarded as noise.  
298

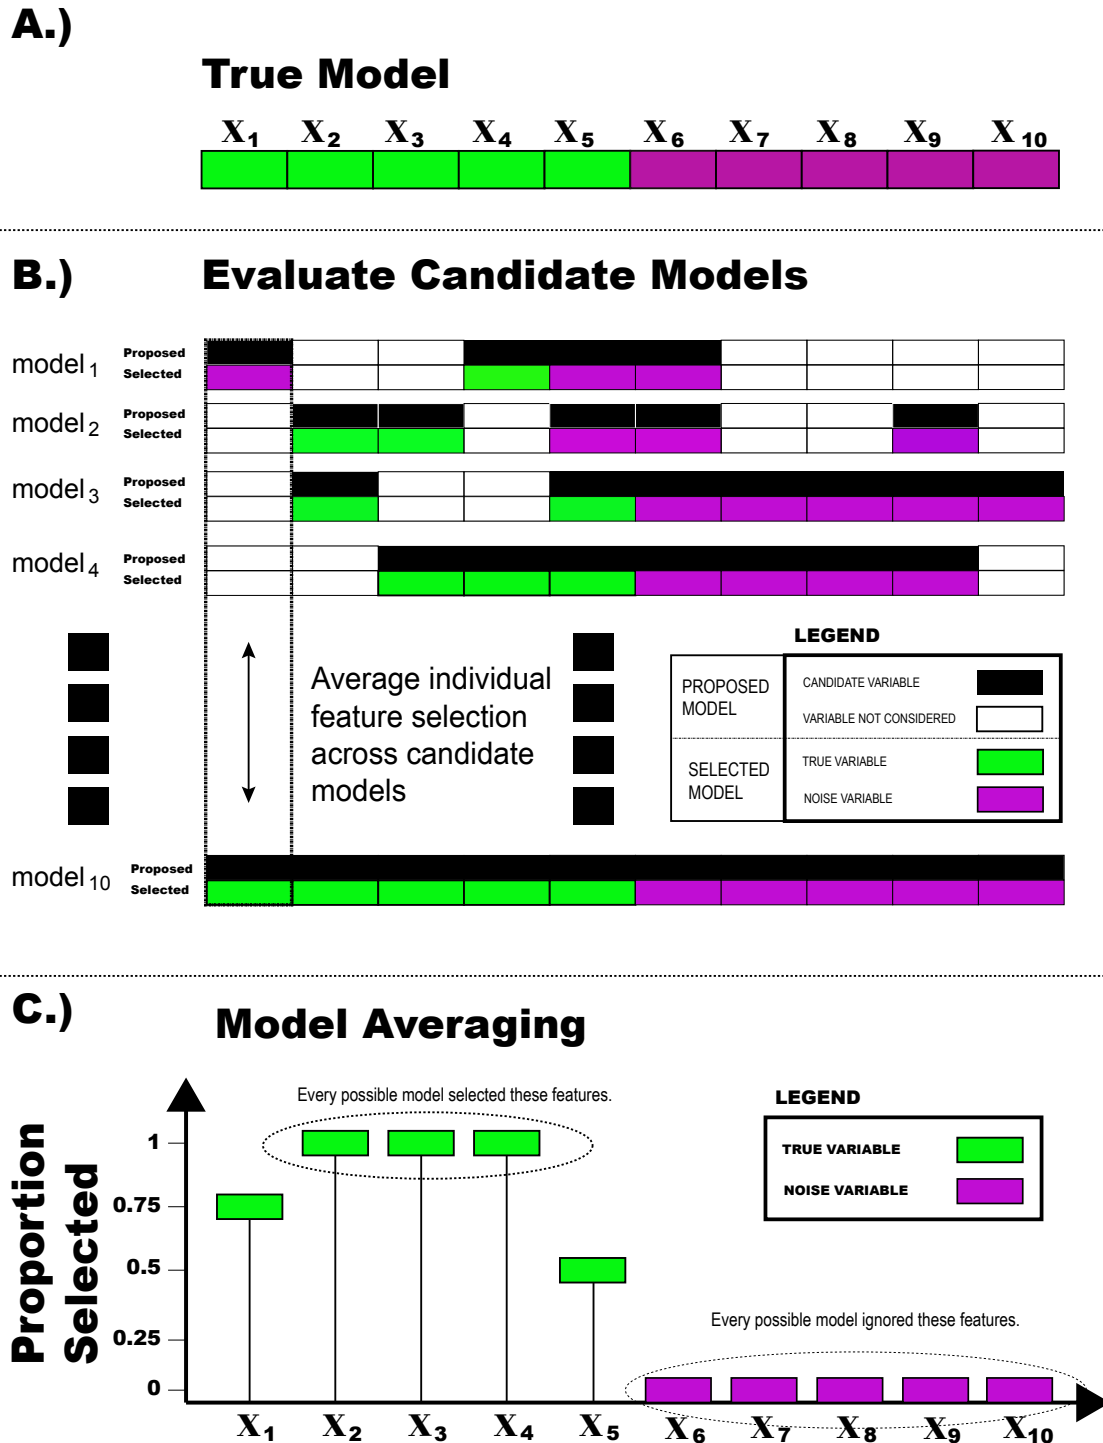

299

300

301

302

**Fig. 3. binomialRF model averaging visualization example.** (A) shows the true simulated model with  $P=10$  predictors. The first five of these predictors are “true” variables while the remaining 5 are pure noise. In (B), we try 10 different candidate models, each of which includes

303 a random subset of predictors, while the last model includes all predictors. Each of the candidate  
304 models, (like model<sub>1</sub> for example) sees a set of features (black = included, white = excluded)  
305 and then determines whether they are significant (green) or not (purple). (C) Each of the 10  
306 model's recommendations are averaged into a final model consensus by showing how often each  
307 of the features was deemed significant. True features will be closer to 1 (i.e., selected 100% of  
308 the times across all models), while noisy features will tend closer to 0. The power and robustness  
309 of model averaging lies in that individual candidate models may make occasional errors due to  
310 random chance and noise (like model<sub>1</sub> for example ignoring feature  $X_1$ ), but the noise tends to  
311 get averaged out via model averaging, as majority voting will overcome individual mistakes.

## 312 **2.8 Evaluations in Numerical Studies**

### 313 **2.8.1 Logistic Dataset Generation**

314 To understand the strengths and limitations of the binomialRF feature selection algorithm and to  
315 compare its performance with the state of the art, we conduct a variety of numerical studies.  
316 These simulation scenarios generate logistically-distributed data to mimic binary classification  
317 settings. The gold standard is generated by first creating a coefficient vector  $\beta$  whose first five  
318 elements are non-zero and the remaining are zero. Then,  $X_{N \times P}$ , random multi-variate standard  
319 normal matrix with  $N$  samples and  $P$  features, is generated to mimic a standardized and centered  
320 genomics matrix, and finally,  $X$ , undergoes a logistic transformation from which a Bernoulli  
321 random variable is generated to mimic the binary class vector,  $Y$ .

### 322 **2.8.2 Modifying Signal-to-Noise Ratio**

324 To understand the strengths and limitations of the binomialRF feature selection algorithm and to  
325 compare its performance with the state of the art, we conduct a variety of numerical studies that  
326 compare different signal-to-noise ratio settings. These simulation scenarios generate logistic data  
327 as the gold standard with a coefficient vector  $\beta$  whose first five elements are non-zero and the  
328 remaining are zero. The signal-to-noise ratio is altered in two ways to determine how robustly  
329 each technique is able to handle noise. First, the magnitude of the non-zero coefficients are  
330 increased from 1 to 3 to evaluate how much better each technique is able to determine the true  
331 variables from noise. Later, we increase the number of features,  $P$ , in the design matrix,  $X_{N \times P}$ ,  
332 10-fold from 10 to 100 to 1,000. Each time we fix the number of true features to 5, making the  
333 remaining  $P - 5$  noise features, which enables us to evaluate how well each technique is able to  
334 select the 5 true features in the presence of 5, 95, and 995 noisy features, respectively. The  
335 numerical studies are presented in Section 5. Results for  $\beta = [1_5 \ 0_{P-5}]^T$  are shown in **Figure 6**  
336 while the results for  $\beta = [3_5 \ 0_{P-5}]^T$  are available upon request and are omitted as they present  
337 minimal additional information. In the simulation study, we seeded a small number of true  
338 features relative to the number of noisy features and then used model averaging to perform  
339 feature selection. We ran the model averaging algorithm twice, using the following decision  
340 rules.

- 341
- 342 • Proportion Selected ( $X_j$ )  $\geq 0.5$ ,
- 343 • Proportion Selected ( $X_j$ )  $\geq 0.9$ .

344

345 This second cutoff was chosen due to empirical results suggesting that as the number of  
346 candidate models increases, the Proportion Selected ( $X_j$ ) approaches 1. That is, the limit of its  
347 selection proportion will approach 1 as the number of candidate models  $L$  goes to infinity (i.e.,  
348  $\text{Limit}_{L \rightarrow \infty} \text{Proportion Selected} (X_j) \rightarrow 1$ ). We report simulation results for Proportion Selected  
349 ( $X_j \geq 0.9$ ).

## 350 **2.9 Evaluations in Clinical Studies**

### 351 **2.9.1 Overview of the Asthma Clinical Validation Study**

352 To determine the utility of the binomialRF feature selection algorithm in translational  
353 bioinformatics, we conducted a validation study mirroring a prior study that focused on the  
354 translational impact of random forest classifiers.

355  
356 Specifically, the study by Gardeux et al [26] determined whether

- 357  
358 1.) a classifier predicting symptomatic subjects among healthy adults who were inoculated  
359 with human rhinovirus (HRV) (i.e., the common cold) using their blood transcriptome  
360 data before and during infection could forecast which pediatric asthmatic patients will  
361 experience recurrent exacerbations using their transcriptomes derived from *ex vivo*  
362 incubation of their blood with and without HRV.
- 363 2.) we could develop a fully-specified random forest classifier (i.e., set of features) to make  
364 these predictions using dynamic genomic information (i.e., gene expression data) before  
365 and after HRV exposure.

366  
367 The study examined a few different machine learning techniques and developed a random forest  
368 classifier that identified key pathways to predict asthma exacerbation.

369

### 370 **2.9.2 Asthma Clinical Validation Datasets**

371 The two datasets in this clinical validation are described in **Table 3** and contain microarray data  
372 from two different studies. The first study, conducted by researchers at Duke [22] in 2009,  
373 looked at understanding dynamic changes in gene expression data in healthy adults as a response  
374 to human rhinovirus (HRV) infection and measured the rhinovirus symptoms (about 50% were  
375 asymptomatic yet shedding the virus and the remainder were symptomatic and was used as a  
376 “training set” to develop the classifier) [23]. The second dataset was a tightly-controlled clinical  
377 trial conducted at the University of Arizona within severe asthmatic patients to determine  
378 whether the *ex vivo* HRV incubation of the peripheral blood mononucleocytes would be  
379 associated to ulterior asthmatic exacerbation. This dataset was designed to predict asthmatic  
380 exacerbation, a phenotype that was established during a 1-year follow-up and was defined as

381

- 382 - No Exacerbation: patients with no hospitalizations and/or emergency room visits; or
- 383 - Recurrent Exacerbation: patients with hospitalizations and/or emergency room visits.

384

385 The clinical trial was designed in a tightly-controlled fashion in which all patients’ demographic  
386 and clinical profiles were verified and shown equally distributed between the two groups [23]

387 (no obvious confounders), and all patients received the same maximal treatment to mitigate  
388 exacerbations.

389

390 **Table 3: Asthma Validation Study Datasets.**

|                    | Training Data [22]                                        | Testing Data [23]                                                                                                                                   |
|--------------------|-----------------------------------------------------------|-----------------------------------------------------------------------------------------------------------------------------------------------------|
| Description        | <i>In vivo</i> HRV stimulus-response in 19 healthy adults | <i>Ex vivo</i> HRV stimulus-response of peripheral blood mononucleocytes of 23 severe asthmatic children (followed one year with maximal treatment) |
| Data and Platform  | Microarray, Affy. Human Gene U133A 2.0                    | Microarray, Affy. Human Gene 1.0ST33297                                                                                                             |
| Outcome Prediction | 10 symptomatic, 9 asymptomatic                            | 12 recurrent exacerbations, 11 no asthma exacerbation                                                                                               |
| Data Collection    | 19 microarrays before HRV, 19 microarrays after HRV       | 23 microarrays before HRV, 23 microarrays after HRV                                                                                                 |
| GEO Access Tag     | GSE17156                                                  | GSE68479                                                                                                                                            |

391

392 Both datasets contained microarray data at the gene-product and were transformed using the *N-*  
393 *of-1-pathways*[24] framework to determine whether a gene-ontology biological process pathway  
394 was dysregulated in each patient. Thus, the final design matrix  $X_{N \times P}$  contained  $\sim 20$  subjects in  
395 each group and approximately 3,000 pathways. The goal of our Asthma case study is to  
396 determine whether our feature selection technique could confirm the clinical findings (i.e.,  
397 reproduce the predicted pathways in the study), attain similar prediction performance, propose  
398 new pathway discoveries, and extend their study by proposing pathway-pathway interactions.

### 399 **3 binomialRF: identifying interactions**

#### 400 **3.1 Current Available Interactions Screening and Selection Techniques**

401 In classical linear models when detecting 2-way interactions, interactions are included in a  
402 multiplicative fashion and treated as a separate feature in the model with its own linear  
403 coefficient term. Here, we denote  $X_i \otimes X_j$  as an interaction between  $X_i$  and  $X_j$ . The main  
404 regularity condition imposed in interactions in linear models is strong heredity. Strong heredity is  
405 the requirement that if  $X_i \otimes X_j$  is an interaction in the model, then both  $X_i$  and  $X_j$  must be  
406 included in the model. Similarly, under weak heredity, at least one of the two features must be  
407 included individually in the model if the interaction is included. The argument between allowing  
408 weak vs. strong heredity revolves around which properties a model can attain under certain  
409 regularity conditions as well as feasibility and utility [25, 26]. However, under tree-based  
410 models, strong heredity hierarchy is automatically induced as a natural consequence of the binary  
411 split tree's structure. This reduces computational inefficiencies in forcing strong heredity as well  
412 as avoids irregularities present under weak heredity. Therefore, it makes the interaction search  
413 more computationally feasible and statistically rigorous.

#### 414 **3.2 binomialRF: Identifying 2-way Interactions**

415 To generalize the binomialRF algorithm to search for 2-way interactions, we generalize  
 416 **Equation 3** by adding another product term to denote the second feature in the interaction set to  
 417 calculate  $p_{2\text{-way}}$ .  
 418

$$p_{2\text{-way}} = \frac{1}{2} \left[ \left( 1 - \left( \prod_{g=1}^m \frac{P-g}{P-(g-1)} \binom{1}{m} \right) \right) \left( 1 - \left( \prod_{g=1}^m \frac{(P-1)-g}{(P-1)-(g-1)} \binom{1}{m} \right) \right) \right] \quad (6)$$

419  
 420 As we are interested in selecting interactions and if  $X_j$  is selected at the root node, then it is no  
 421 longer available for selection subsequently. Thus, we replace  $P$  with  $(P - 1)$ , and we include a  
 422  $1/2$  normalizing constant since the interaction can happen two different ways (either via the left  
 423 or right child nodes). **Figure 4A** provides the visual representation of how to generalize  
 424 binomialRF to identify a 2-way interaction by looking at pairs of features starting at the root  
 425 node.  
 426

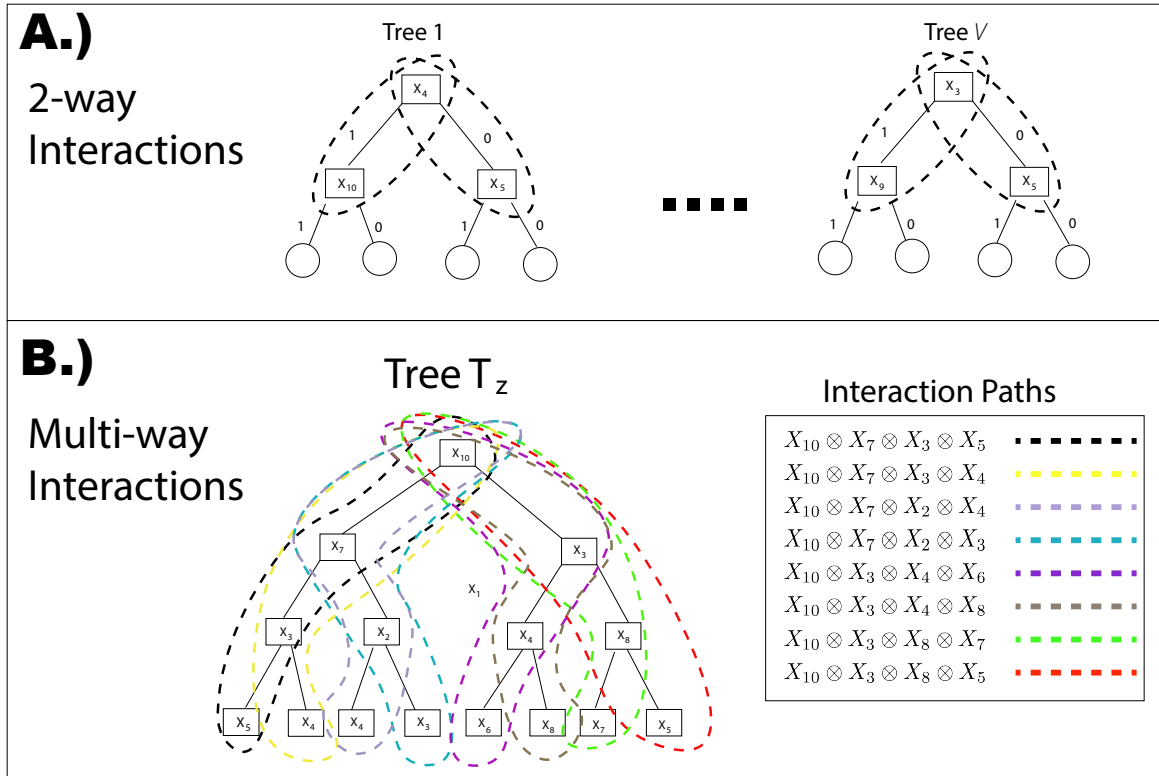

**Fig. 4. Calculating Interactions.** (A) **2-way Interactions.** To illustrate how the binomialRF algorithm extends to identify 2-way interactions, the test statistic is generalized to evaluate the frequency,  $F_{ij}$  of each  $X_i \otimes X_j$  pair of interactions that occur in the random forest. The probability of the interaction occurring by random chance is recalculated and normalized by a factor of a half, and then a binomial exact test is conducted. (B) **K-way interactions,  $K = 4$ .** Here, we illustrate the tree traversal process to identify all 4-way interactions,  $\otimes_{i=1}^4 X_i$ , with each color denoting a possible interaction path. The legend in the right shows how each interaction path results in a set of 4-way feature interactions. In general, for any user-desired



$K$ , the  $k$ .binomialRF algorithm traverses the tree via dynamic tree programming to identify all possible paths from the  $K$ -terminal nodes to the root, where  $K$ -terminal nodes are all nodes  $K$ -steps away from the root node.

427

428 Next, we update the hypothesis test in (4) and modify it to identify 2-way interactions for all  
429 possible  $X_i \otimes X_j$  pairs.

430

431 binomialRF 2-way Interaction Selection Hypothesis Test

432

$$H_0: Pr(X_i \otimes X_j) \leq p_{2-way} \quad H_A: Pr(X_i \otimes X_j) > p_{2-way} \quad \text{Hypothesis Test} \quad (7-a)$$

$$F_{X_i \otimes X_j} = \sum_{z=1}^V F_{X_i \otimes X_j, z} \sim \text{Binomial}(V, p_0) \quad \text{Test Statistic} \quad (7-b)$$

$$R = \{X_i \otimes X_j: F_{ij} < Q_{\alpha, V, p_{2-way}}\} \quad \text{Rejection Region} \quad (7-c)$$

433

### 434 3.3 binomialRF: Generalizing to identify $K$ -way interactions

435 To generalize **Equation 6** into multi-way interactions and calculate  $p_{K-way}$ , we first note that  
436 for any multi-way interaction of size  $K$  in a binary split tree results in  $2^{K-1}$  terminal nodes.  
437 Therefore, there are  $2^{K-1}$  possible ways of obtaining the  $K$ -way interaction (**Figure 4B**). Thus,  
438 the normalizing constant in **Equation 6** is replaced to  $2^{K-1}$  in **Equation 8**. The two products in  
439 **Equation 6** are now expanded to become  $K$  different product terms (each representing the  
440 probability of selecting individual features in the interaction set), and  $(P - 2)$  is replaced with  
441  $(P - k)$  to account for sampling without replacement, which yields **Equation 8**.

442

$$p_{K-way} = \frac{1}{2^{K-1}} \prod_{k=1}^K \left( 1 - \left( \prod_{g=1}^m \frac{(P-k)-g}{(P-k)-(g-1)} \binom{1}{m} \right) \right) \quad (8)$$

443 Next, we update the hypothesis test in **Equation 7** and modify it to identify 2-way interactions  
444 for all possible  $\otimes X_{i=1}^K$  sets.

$$H_0: Pr(\otimes \mathbf{X}_{i=1}^K) \leq p_{k-way} \quad H_A: Pr(\otimes \mathbf{X}_{i=1}^K) > p_{k-way} \quad \text{Hypothesis Test} \quad (9-a)$$

$$F_{\otimes X_{i=1}^K} = \sum_{z=1}^V F_{\otimes X_{i=1}^K, z} \sim \text{Binomial}(V, p_{K-way}) \quad \text{Test Statistic} \quad (9-b)$$

$$R = \{ \otimes \mathbf{X}_{i=1}^K : F_{\otimes X_{i=1}^K} < Q_{\alpha, V, p_{k-way}} \} \quad \text{Rejection Region} \quad (9-c)$$

445

### 446 3.4 Using dynamic tree programming to search for interactions

447 Let any node at the  $K^{th}$  level of a tree be a “ $K$ -terminal” node. Binary split trees have exactly  
448 two child nodes for every non-terminal node; therefore, to climb up from every  $K$ -terminal node  
449 to the root, we can calculate the path recursively back to the root. This is done by traveling up a  
450 node’s parent node until we reach the root. The climbToRoot algorithm is provided in the  
451 Appendix (A2), and a pseudo-algorithm is provided below to illustrate the main concepts.

452

### 453 **Pseudo-Algorithm**

- 454 • Identify  $K$ -terminal (child) node
- 455 • For each  $K$ -terminal (child) node
  - 456 ○ Initialize each interaction path as the child node
  - 457 ○ While (child node  $\neq$  root node)
    - 458 ▪ Determine if child node is left or right daughter node
    - 459 ▪ `new.parent.node`  $\leftarrow$  Identify parent node
    - 460 ▪ Append `new.parent.node` to interaction path
    - 461 ▪ `Child.node`  $\leftarrow$  `new.parent.node`
  - 462 ○ Return (interaction path)
- 463 • Return (all  $2^{K-1}$   $K$ -set interaction paths)

### 464 **3.5 Evaluations in Numerical Studies**

465 To understand the strengths and limitations of the binomialRF feature interaction selection  
466 algorithm, we conducted various small-scale numerical studies in which an interaction or set of  
467 interactions were seeded and evaluated how well the binomialRF algorithm detected the  
468 interaction. In contrast to the main effects numerical studies that examined signal-to-noise ratio  
469 across different dimensions, this focus was to evaluate whether binomialRF could detect the  
470 interaction structures in absence of explicitly mapping them into the design matrix.

### 471 **3.6 Evaluations in Clinical Studies**

472 Biological and genomics analyses that omit interactions will assume biology occurs in isolation;  
473 thus, to fully validate the binomialRF algorithm, we extend the clinical study from traditional  
474 biomarker discovery to biomarker interactions. The prior study by Gardeux[23] examined a  
475 pathway-level random forest classifier, and in this component of the evaluation, we consider  
476 pathway-pathway interactions.

477  
478 As described in Section 2.9, the clinical trial datasets each contained approximately 3,000  
479 pathways, yielding approximately  $\binom{3000}{2} = 4,498,500$  possible 2-way interaction combinations.  
480 A brute-force approximation would require storing a matrix 1,500 times larger in order to give  
481 every 2-way combination an equal chance of attaining significance. In our case study, we show  
482 how to use binomialRF as an interaction screening process to drastically reduce the computation  
483 time.

## 484 **4 Complexity Analysis**

485 The algorithm binomialRF has a 2-way computational efficiency as compared to traditional  
486 feature selection methods in random forests since a) it attains a minimal computation complexity,  
487 and b) it requires minimal memory storage during runtime. Section 4.1 describes the memory  
488 required at runtime, while Section 4.2 notes the theoretical computational complexity and  
489 conducts some studies to show computational gain over the state of the art.

### 490 **4.1 Memory Storage Requirements**

491 To illustrate the magnitude of memory gained by binomialRF, we use a simple case with 10  
 492 variables to show how much more memory is required to calculate 2-way interactions. As seen in  
 493 **Table 4**, to calculate 2-way interactions, binomialRF only requires an  $n \times 10$  matrix whereas  
 494 any other technique would require an  $n \times 55$ , effectively 5 times more RAM during runtime.  
 495 To calculate 2-way interactions in a moderately larger dataset with 1000 variables, it would  
 496 require approximately 500 times more memory. **Table 4** illustrates the relative memory  
 497 requirements for calculating 2-way and 3-way interactions when there are 10, 100, and 1000  
 498 predictors in the design matrix,  $X$ .

500 **Table 4: Required Memory Storage for 2-way and 3-way computations.** One advantage of  
 501 the binomialRF algorithm is that it can screen for sets of gene interactions in a memory efficient  
 502 manner by only requiring a constant-sized matrix

| Dimension P | K =<br>Interaction<br>Size | Dim(X)   | Dim ( $\otimes X_{i=1}^K$ ) | Memory Gain =<br>$\frac{\text{Dim}(\otimes X_{i=1}^K)}{\text{Dim}(X)}$ |
|-------------|----------------------------|----------|-----------------------------|------------------------------------------------------------------------|
| 10          | 2                          | N x 10   | N x 55                      | ~ 5                                                                    |
|             | 3                          |          | N x 175                     | ~ 17                                                                   |
| 100         | 2                          | N x 100  | N x 5050                    | ~ 50                                                                   |
|             | 3                          |          | N x 166750                  | ~ 1,700                                                                |
| 1000        | 2                          | N x 1000 | N x 500500                  | ~ 500                                                                  |
|             | 3                          |          | N x 166667500               | ~ 170,000                                                              |

503 Thus, the memory storage gains are not trivial for even simple 2-way interactions, let alone  $K$ -  
 504 way interactions. Note that in linear models, efficient solution paths for  $\otimes X_{i=1}^K$  only exist for  
 505  $K \in \{1,2\}$  (LASSO[16] for  $K=1$  and RAMP[27] for  $K=2$ ). For  $K>2$ , no algorithm guarantees  
 506 computational efficiency. In RF-based feature selection techniques examined in this paper, no  
 507 efficient solutions exist to scalably identify interactions.

## 509 4.2 Computational Complexity

510 The computational complexity of detecting interaction is on the order of  $O(V2^{K-1})$  where  $V$  is  
 511 the number of trees grown in the forest, and  $K$  (usually small) is the depth of the interaction  
 512 search in a binary split tree. For example, in order to calculate 2-way interactions, the algorithm  
 513 complexity requires only twice as many operations as for main effects, rather than  $\binom{P}{2}$  more  
 514 operations (one for each explicitly-mapped interaction). As seen in the clinical study validation,  
 515 when  $P=3,000$  pathways, looking at 2-way interaction screening only requires ~6,000  
 516 calculations, rather than  $\binom{3000}{2} = 4,498,500$  brute-force calculations. For a permutation-based  
 517 algorithm, this would mean in an additional 4,498,500 permutation-tests to determine interaction  
 518 significance. This substantial computational gain occurs because a decision tree's binary split  
 519 limits the search space drastically, at most growing by powers of 2. This is still exponential  
 520 growth, however, since interactions are usually limited to measuring 2-way or 3-way  
 521 interactions, the  $2^{K-1}$  term is for all practical purposes a constant, thus empowering the  
 522 binomialRF interaction search to provide a quasi-linear approximation to a non-polynomial time  
 523 problem.

## 524 5 Numerical results

525 In this section, each method is evaluated based on its computation speed (runtime), classification  
526 accuracy, and model selection. To evaluate computation time, each method's runtime is reported  
527 in total seconds with the range of performances displayed in a boxplot; to evaluate classification  
528 accuracy, the standard 0-1 unweighted classification loss function is used; and to evaluate model  
529 selection, false selection rates and discovery rates will be used to determine how well the  
530 techniques recover the 'true' model.

## 531 5.1 Simulation study: Main effects

532 We generate a simple simulated logistic dataset by generating a multivariate standard normal  
533 feature matrix composed of  $P$  features and 100 data points. The true model consists of a  $\beta$  vector  
534 where the first five coefficients are non-zero and the last  $P-5$  are zero. Finally, the binomial  
535 outcomes are generated using a logistic transformation to calculate the probabilities for the  
536 Bernoulli random variable. We simulate various signal-to-noise ratio settings in two different  
537 ways. First, we let the five nonzero coefficients be either all 1s or all 3s to determine if the  
538 algorithm is robust to decreasing the magnitude of the coefficients in the logistic model. Second,  
539 we add noise by increasing the number of irrelevant features relative to the five nonzero 'true'  
540 variables. We increase the dimension of  $P$  10-fold while keeping constant the number of nonzero  
541 coefficients to increase the relative noise in the predictor matrix. Formally, the simulation  
542 structure is illustrated below:

$$\begin{aligned} \beta &= [\text{nonzero coefficients} \in \{1_5, 3_5\} \quad 0_{P-5}], \quad \forall P \in \{10, 100, 1000\} \\ X_{100 \times P} &\sim MVN(0_{10}, I_{10 \times 10}) \\ Y &\sim \text{Binomial}\left(n = 100, \quad \text{prob} = \frac{1}{1 + e^{-X^T \beta}}\right) \end{aligned} \quad (10)$$

### 544 5.1.1 Computation time

545 In order to compare the computation time of each model as accurately as possible, we strictly  
546 measure the time it takes for the algorithm to produce a feature ranking or p-value and omit all  
547 other portions of the algorithm using the `system.time` R function as seen below:

```
548 1. ## binomialRF time profile  
549 2. binomialRf.time = system.time(binom.rf <- binomialRF(X,y, ...))
```

550 In order to measure scalability in the predictor space, 500 random forest objects are grown with  
551 500 trees, measuring each algorithm's run time. We repeat this experiment expanding the  
552 dimension of  $X_{N \times P}$  10-fold each time and measure the runtime as the predictor matrix increases  
553 dimension. The runtimes are graphically summarized in powers of 10 (i.e.,  $\log_{10}$ ) in **Figure 5** as  
554 the larger runtimes otherwise dominate the boxplots and do not allow for visual differentiation  
555 between all techniques. The tests were all run on a 2017 MacBook Pro laptop with 16GB RAM,  
556 Intel Core i5, with 4 cores using R version 3.4.0 (64-bit).

557  
558 The runtimes are shown in the boxplots in **Figure 5**, ranked left to right by median runtime. The  
559 binomialRF is consistently the fastest tree-based feature selection algorithm while the  
560 binomialRF model averaging is on average the second fastest algorithm. Note, the model  
561 averaging algorithm considers 10 different candidate models to perform feature selection, and

562 the runtime reported measures the time it took to average the results of all 10 candidate models.  
 563 We increased the number of features from 10 to 1000 to mimic a high dimensional space (where  
 564  $P \gg N$ ) and asses which techniques scale well in high dimension. In the high-dimensional  
 565 setting of  $P = 1,000$ , the binomialRF's mean runtime was 0.96 seconds while other techniques  
 566 required on average between 30 to 600 seconds per run to analyze 1,000 features. A tabular  
 567 summary of the runtimes was omitted to remove redundancy and is available upon request.

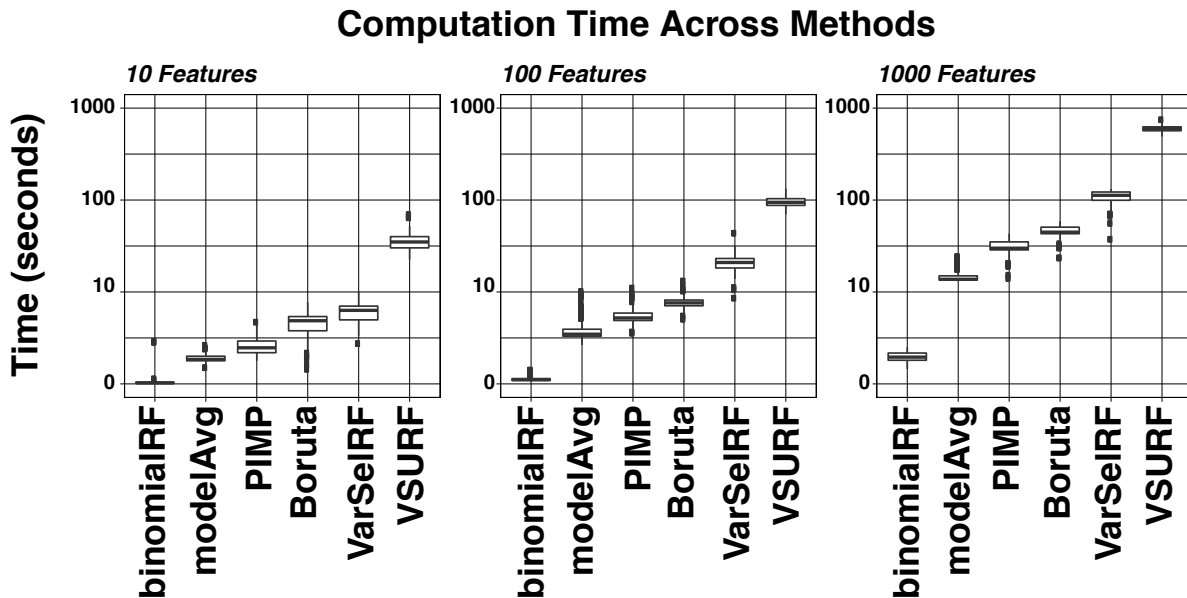

568  
 569 **Figure 5: Time profiling across techniques.** The simulation scenarios are detailed in Section  
 570 3.1, where the length of the coefficient vector,  $\beta$ , varies, but the first five elements are nonzero  
 571 and P-5 are zero. Rather than measure accuracy and model identifiability criteria across each of  
 572 the techniques in this set of simulation runs, we only measure the computational runtime of each  
 573 technique after the main randomForest function call in R. The runtimes are reported in log base  
 574 10 (adding +1 to all values to avoid ‘negative’ runtimes), and all simulations were conducted on  
 575 a 2017 MacBook Pro with 3.1 GHz Intel Core i5 and 16 GB of RAM. All simulations resulted in  
 576 binomialRF obtaining the fastest runtimes followed by binomialRF model averaging (denoted  
 577 ‘modelAvg’ in graph).

#### 578 5.1.2 Misclassification test error, model size, false selection rate and coverage

579 To assess the feature selection techniques, we evaluate them based on the accuracy of the  
 580 induced final model, average model size, false selection rate (FSR), and true variable coverage.  
 581 The test error is measured via a standard 0/1 loss function, and the FSR and Coverage formulas  
 582 are defined below:

$$\text{FSR} = \frac{U}{U+I+1} \quad \text{Coverage} = \frac{I_{\text{Selected}}}{I_{\text{Total}}} \quad (11)$$

583 where  $U$  = uninformative variables in model,  $I$  = informative variables in model,  $I_{\text{selected}}$  is the  
 584 number of “true” features each algorithm detected, and  $I_{\text{Total}} = 5$  is the number of true

585 predictors. The +1 is added in the denominator of the FSR formula to ensure non-degenerate  
 586 cases when no variables are selected (or alternatively viewed as an intercept in a linear model).  
 587 Results are shown in **Figure 6**. Across the majority of the simulations, the final binomialRF-  
 588 induced model, on average, results in a lower test error and attains the highest true variable  
 589 coverage. However, the Boruta algorithm consistently attains the best FSR. In high dimension,  
 590 the binomialRF trade-off results in a higher FSR in order to attain better coverage.  
 591

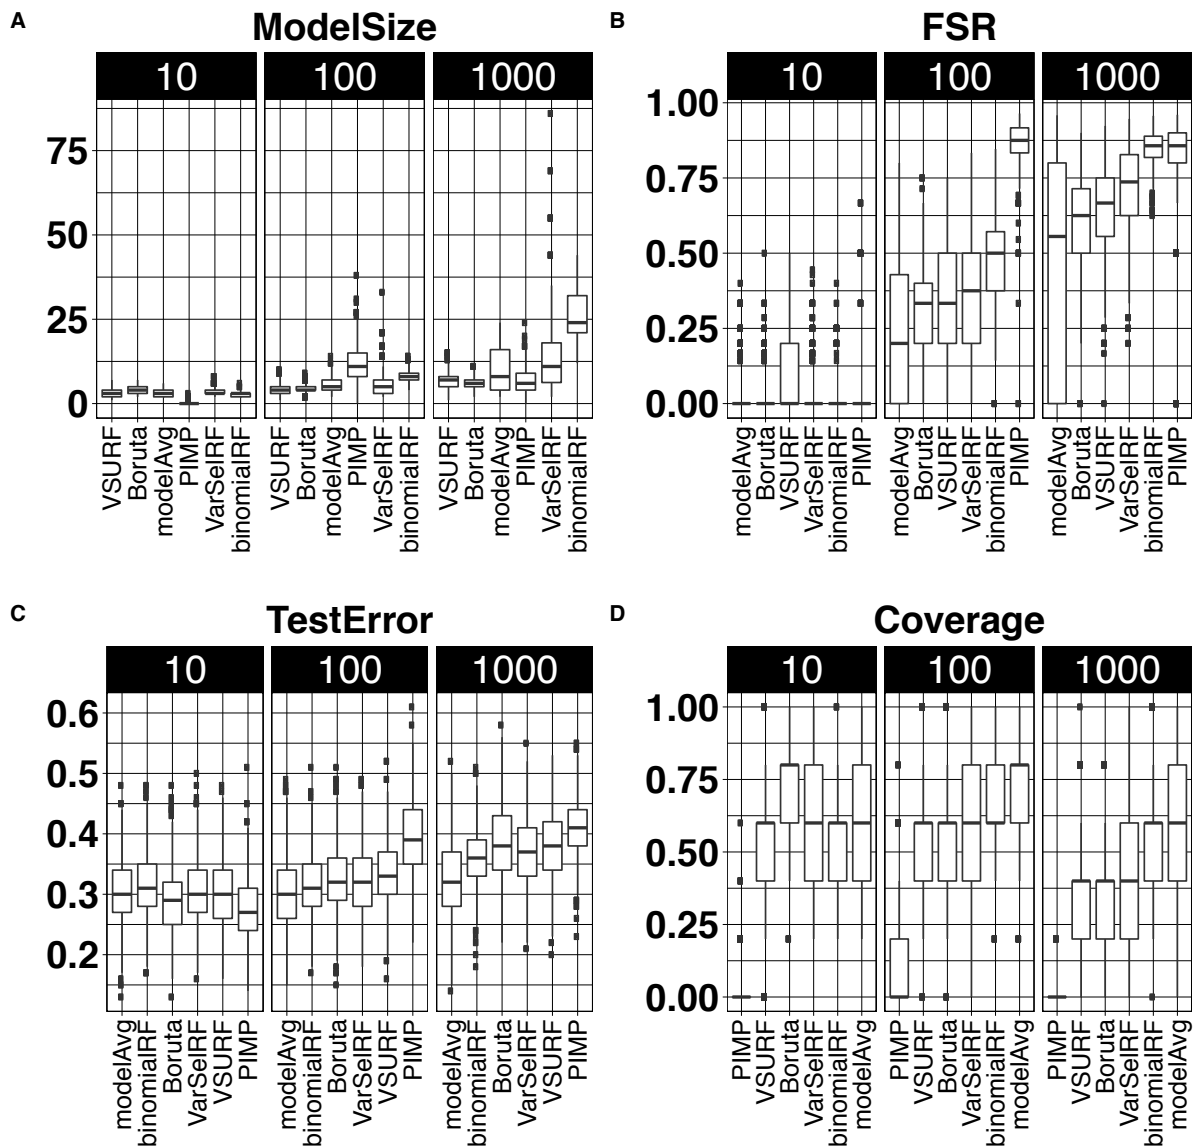

**Figure 6: Main Effects Simulation Study.** Each technique is ranked using model size, false selection rate, true coverage and test error as the evaluation criteria. In each panel, the model size, false selection rate (FSR), coverage rate, and testing errors are reported and each technique. (A) Each technique selects their ‘model’, based on the features they selected, and

then the test error is shown, repeating this process for  $P=10, 100, \text{ and } 1000$  features. (B) and (C) measure how often each technique selects true and phony variables, where lower values (B) and higher values in Panel C indicate greater model selection accuracy. Finally, (D) records the model size to put into context the values in (B) and (C). Across these simulations, the binomialRF model averaging selection, on average, resulted in the lowest test error and optimal model selection (i.e., maximized the true variable coverage controlled for false selection even in high noise settings).

592  
593  
594  
595  
596  
597  
598  
599  
600

**Table 5: Simulation Results for  $P = 1000$ .** Averaged results (with 1 sd) are reported for the high-dimensional ( $P=1000$ ) where there is the largest signal-to-noise ratio as there are 5 true features and 995 noisy features. As shown, the binomialRF algorithm attains high coverage but at the expense of high false selection in high dimensional settings whereas Boruta trades lower coverage for sparser, more accurate models. The binomialRF model averaging selection, however, is able to better control for false selection and maximize coverage, resulting in a better classification accuracy in the test set.

| Model                             | Coverage          | FSR                | Model Size      | Test Error         |
|-----------------------------------|-------------------|--------------------|-----------------|--------------------|
| Boruta                            | 0.33 (0.19)       | 0.61 (0.15)        | <b>6 (1.96)</b> | 0.38 (0.06)        |
| PIMP                              | 0 (0.03)          | 0.8 (0.19)         | 6.7 (3.9)       | 0.41 (0.05)        |
| VSURF                             | 0.33 (0.19)       | 0.64 (0.16)        | 6.87 (2.48)     | 0.38 (0.06)        |
| VarSelRF                          | 0.45 (0.22)       | 0.71 (0.15)        | 13.44 (10.19)   | 0.37 (0.06)        |
| binomialRF                        | 0.57 (0.19)       | 0.85 (0.05)        | 25.97 (7.11)    | 0.36 (0.05)        |
| <b>binomialRF model averaging</b> | <b>0.6 (0.21)</b> | <b>0.41 (0.39)</b> | 9.93 (6.6)      | <b>0.32 (0.07)</b> |

601

## 602 5.2 Simulation study: 2-way Interactions

603 To determine whether binomialRF can successfully detect interactions, we ran two different  
604 simulation studies. The first study considers the following model:

605

$$\begin{aligned}
 X &\sim MVN(0_{10}, I_{10 \times 10}) \\
 z &= 1 + X_1 + X_3 + (X_1 \otimes X_3) \\
 Y &\sim Binomial\left(n = 100, \quad prob = \frac{1}{1 + e^{-z}}\right)
 \end{aligned}
 \tag{12}$$

606 500 different simulation runs were conducted, each growing 500 trees in the forest. The averaged  
607 results for the top 10 interactions (ranked in order of significance) are shown in **Table 6-A**. As  
608 shown in **Table 6**, the binomialRF is clearly detecting the signal in the  $X_1 \otimes X_3$  interaction at a  
609 higher rate than random combinations of main effect signals and noise (i.e.,  $X_1 \otimes X_8$ ). Thus, in  
610 the simple 2-way interaction, the binomialRF model clearly detects the signal. The second  
611 interaction simulation study considers the following slightly more complicated model where two  
612 sets of 2-way interactions are now present:

613

$$X \sim MVN(0_{10}, I_{10 \times 10})
 \tag{13}$$

$$z = 1 + X_1 + X_3 + (X_1 \otimes X_3) + X_2 + X_4 + (X_2 \otimes X_4)$$

$$Y \sim \text{Binomial}\left(n = 100, \quad \text{prob} = \frac{1}{1 + e^{-z}}\right)$$

614  
615  
616  
617

Similarly, as before, 500 trees were grown, and 500 different simulation runs were conducted. The averaged results for the top 10 interactions (ranked in order of significance) are shown in **Table 6-B**.

**Table 6: Interaction Simulation Studies. Panel A.) Simulation Study 1 (equation 12).** The only interaction that was seeded in the simulated data was the  $X_1 \otimes X_3$  interaction, and our feature selection algorithm is detecting it as the only true significant interaction and disregarding everything else. **Panel B.) Simulation Study 2 (equation 13).** The binomialRF is detecting the signal in the  $X_1 \otimes X_3$  and  $X_2 \otimes X_4$  interactions (which were the true interactions seeded in the simulation) at a higher rate than random combinations of main effect signals and noise, which are the true interactions seeded in the data. However, since  $X_1, X_2, X_3,$  and  $X_4$  have such a dominant signal, binomialRF is also suggesting we screen for all possible 2-way interactions between them (in yellow). Thus, since in real-life datasets, the true solution is never known, the binomialRF algorithm will detect a signal where it can and screen for potentially meaningful interactions where they arise, and the binomialRF model averaging framework can then be applied to parse through the noise.

### A.) Simulation Study 1

Interaction seeded:  $X_1 \otimes X_3$

### B.) Simulation Study 2

Interactions seeded:

$X_1 \otimes X_3$  and  $X_2 \otimes X_4$

| Interaction          | Frequency | Adj.Pval |
|----------------------|-----------|----------|
| $X_1 \otimes X_3$    | 130.1     | 4.41E-06 |
| $X_1 \otimes X_{10}$ | 34.3      | 0.074    |
| $X_3 \otimes X_9$    | 31.7      | 0.091    |
| $X_1 \otimes X_4$    | 32.6      | 0.093    |
| $X_1 \otimes X_5$    | 32.5      | 0.094    |
| $X_1 \otimes X_7$    | 32.4      | 0.095    |
| $X_2 \otimes X_3$    | 30.3      | 0.096    |
| $X_3 \otimes X_4$    | 31.9      | 0.010    |
| $X_1 \otimes X_8$    | 32.5      | 0.10     |
| $X_1 \otimes X_6$    | 35.8      | 0.10     |

| Interaction       | Frequency | Adj.Pval |
|-------------------|-----------|----------|
| $X_2 \otimes X_4$ | 72.68     | 0.008    |
| $X_1 \otimes X_3$ | 70.46     | 0.02     |
| $X_3 \otimes X_4$ | 59.87     | 0.03     |
| $X_1 \otimes X_2$ | 56.14     | 0.03     |
| $X_1 \otimes X_4$ | 60.32     | 0.04     |
| $X_2 \otimes X_3$ | 57.25     | 0.06     |
| $X_4 \otimes X_6$ | 18.95     | 0.28     |
| $X_4 \otimes X_9$ | 19.55     | 0.31     |
| $X_4 \otimes X_7$ | 21.27     | 0.31     |
| $X_1 \otimes X_8$ | 18.32     | 0.31     |

618

## 6 Asthma Validation study

### 6.1 Asthma Validation study: Identifying Pathways

621 The study by Gardeux et al [23] was designed to assess whether it was possible to develop a  
622 fully-specified classifier from healthy adults infected with HRV that predicted asthma  
623 exacerbation in pediatric asthmatic patients who were infected with HRV. They used a variety of



624 machine learning techniques and restricted their classifier to consider 10, 20, and 30 pathways at  
625 a time. The optimal classifier developed was a fully-specified random forest classifier that  
626 attained approximately 73 percent accuracy in the pediatric asthmatic validation-set cohort. Since  
627 our goal is to not develop the optimal classifier but rather provide more interpretability and  
628 assess interactions, we conducted the asthma clinical validation study in a slightly different  
629 fashion following the same overarching concepts. As shown in **Table 3**, the healthy adult  
630 [training] dataset was used to identify meaningful pathways, and the pediatric asthmatic  
631 [validation] cohort was used to confirm their utility. We first ran the binomialRF algorithm on  
632 the healthy adults considering all 3014 pathways and validated its selected pathways in the  
633 asthmatic patients (shown in Appendix A.3). The binomialRF algorithm identified 67 significant  
634 pathways at  $FDR < 5\%$ . 19 out of the 20 pathways identified by [23] were confirmed by  
635 binomialRF while a number of other candidate pathways identified by binomialRF may hold  
636 predictive power and may be physiologically related to the pathway classes identified in [23].  
637 For example, “GO:0006342” is a “chromatin silencing” pathway and this pathway is  
638 physiologically related to Class “V-Chromatin Organization.” Another such example is  
639 “GO:0001763”, a “morphogenesis of a branching structure” pathway that falls under the “Class  
640 III - Morphogenesis” pathway class. Thus, binomialRF is able to confirm known physiologically  
641 discoveries as well as propose biologically-feasible novel candidate pathways for predicting  
642 HRV-induced asthma exacerbation. A binomialRF model averaging analysis was also conducted  
643 – the pathway selection results from the model averaging are located in **Appendix A4**.  
644 **binomialRF Model Averaging in Asthma Validation Study.** A total of 10 candidate models  
645 were proposed by randomly selecting between 200 and 3,000 pathways per model. Each pathway  
646 was then ranked based on its “Proportion Selected” value, and the pathways identified in more  
647 than half the models (i.e., Proportion Selected  $>0.5$ ) were selected into the final model.

## 648 **6.2 Asthma Validation study: Classification Accuracy**

649 To validate these results in the classifier, we also compared the classification accuracy on the  
650 pediatric asthma patients using the pathways selected by the binomialRF model against that of a  
651 random forest trained on all 3,014 pathways. We then compared the binomialRF model  
652 averaging (see **Appendix A4**) to the results obtained by the naïve random forest and the  
653 binomialRF model. The optimal binomialRF model averaging selection resulted in a classifier  
654 with a 67% and 70% mean and median classification accuracy, respectively. It is worth noting  
655 that although the validation accuracy did not surpass the 73% obtained by Gardeux [23], the  
656 binomialRF is a feature selection framework for which classification accuracy is an important  
657 outcome but not the only objective.

## 658 **6.3 Asthma Validation study: Identifying Pathway-Pathway Interaction**

659 To extend the Asthma Validation study from Gardeux et al [23], we also screen for pathway-  
660 pathway interactions. To do dimension reduction and reduce the search space for interactions,  
661 the binomialRF algorithm was first ran (prediction set and testing set) with 67 pathways selected  
662 by a previous run of binomialRF for single factors. Using these 67 pathways, we then screened  
663 for all possible 2-way interactions using the 2-way binomialRF algorithm and identified 107  
664 pathway-pathway interactions (interactions are listed in **Appendix A5**, ranked in order of  
665 significance). These results indicate all the significant interactions that occur between ‘main  
666 effects’ (or pathways deemed significant on their own). As a first step, exploring interactions

667 between ‘main effects’ allows for a bioinformatician to explore “expected” interactions, which  
668 are interactions between the main pathways at play. Restricting the interaction space to the 67  
669 pathways identified by the first run of binomialRF greatly reduces the computational burden, but  
670 it is worth noting that this type of search leads to a confirmation bias as we only allow the  
671 algorithm to search for interactions in pathways in which we expect interactions, rather than  
672 allow for the algorithm to also search for unexpected interactions. Therefore, a proper interaction  
673 search would be more robust under a model averaging setting in order to determine which  
674 interactions are consistently important versus those that are pure noise.

## 675 **7 Discussion**

### 676 **7.1 Feature selection in random forests**

677 In general, machine learning algorithms are judged on three main concepts: interpretability,  
678 scalability, and accuracy. The binomialRF feature selection algorithm provides a relatively  
679 simple interpretation, attains competitive model identifiability and accuracy performance, and  
680 provides a framework that easily scales in high dimensional main effect and interaction settings.  
681 Furthermore, it offers a distinct advantage compared to other feature selection algorithms in  
682 trees, as it easily generalizes to search for interactions using the same binomial exact test. The  
683 heuristic rankings based on the random forest importance measure (like RFE and VarSelRF)  
684 clearly cannot search for interactions since they are restricted to univariate analyses, and  
685 iterations can only eliminate non-important univariate relationships, thus providing zero  
686 information on interactions. The permutation-based tests (like the Permutation-Importance  
687 algorithm) do not generalize (easily at least) to search for interactions since the literature  
688 demonstrates that it is challenging enough as is to estimate empirical null distributions of Z-  
689 scores of importance metrics (Vita, Altmann, etc..), let alone estimating joint Z-score  
690 distributions, or how to construct scalable and efficient algorithms to estimate them.

691  
692 P-value based rankings offer statistical rigor in machine learning-based models as they allow for  
693 more robust measures of gene selection rather than arbitrary cutoffs (i.e., “we selected the top  
694 10%”), while permutation-type tests shuffle predictor values across nodes in a tree which are  
695 expensive operations and disregard node hierarchy in trees. In the former, techniques with  
696 heuristic stopping criteria are subject to arbitrary user-imposed decisions which lack scientific  
697 rigor (i.e., why is selecting the top 10% of genes more scientifically valid than the top 20%?). In  
698 the latter, feature selection techniques that disregard the innate hierarchy in tree-based structures  
699 are losing valuable signal. In the construction of a decision tree, the predictor chosen as the  
700 “splitting variable” in each node is the optimal predictor choice. It intuitively follows that  
701 features selected higher up the hierarchy of the tree have more weight as they are deemed to be  
702 “optimal” in a larger pool of samples, and the root node is theoretically the best feature in each  
703 tree as it is the “first best” feature selected. Therefore, the hierarchy must be respected.

704  
705 The power of model averaging results from the same principle that allows random forests to be  
706 powerful classifiers: an ensemble of weak learners is stronger than an individual strong classifier.  
707 A prediction made from a majority vote or consensus of weak decision trees (i.e., a random  
708 forest) is more robust than a well-pruned decision tree as the ensemble minimizes the effects of  
709 mistakes done by individual trees as long as the majority make the right choice. If we extend this  
710 to feature selection, then the same occurs with binomialRF. An individual run of binomialRF

711 might be sensitive to noise; however, if we rely instead on the consensus of multiple iterations of  
712 binomialRF and add some randomization (both at the feature and sample-size level), then in  
713 order for a feature to be selected into the final model, it has to be selected across the majority of  
714 the candidate models. Therefore, this makes the final model selection more robust and stable.  
715 The binomialRF model averaging runs across the simulation studies resulted in the best  
716 classification rate in the test sets while controlling for false selection and maximizing true feature  
717 coverage. These results confirm the intuition that extending ensemble techniques from classifier  
718 development into feature and model selection will improve the latter. It is also worth noting that  
719 while model averaging is independent of the feature selection technique (and could have been  
720 applied to all other methods), we will explore whether the binomialRF (and largely the binomial  
721 distribution) framework offers theoretical advantages to propose any theoretical asymptotic  
722 results (see limitations and future studies).

## 723 **7.2 Pathway-Pathway Interactions in the Asthma Validation Study**

724 The first interaction listed in the supplemental table (A5) is GO:0016570  $\otimes$  GO:0009581.  
725 GO:0016570 is a histone protein modification pathway while GO:0009581 is a pathway  
726 indicating a response to external stimulus. Their interaction indicates that differential expression  
727 of pathways associated to histone protein regulation is interacting with response to an external  
728 stimulus (likely the HRV-inoculation stimulus). In fact, a few pathway interactions down the list  
729 we see GO:0016570  $\otimes$  GO:0009615, which suggests that differential histone modification in  
730 response to a virus is predictive of recurrent asthma exacerbations as well as of healthy subjects'  
731 symptoms to HRV (plausibly, the human rhinovirus infection). Indeed, histone modification has  
732 been linked to the development of asthma[28, 29] and HRV infection has also been shown to  
733 cause DNA methylation changes in epithelial cells of healthy and asthmatic subjects[30]. These  
734 two pathway-pathway interactions indicate that histone modifications are potentially highly  
735 susceptible to environmental stimuli, suggesting an epigenetic component to asthmatic children's  
736 response to therapy. The previous "genome by environment" classifier by Gardeux et al as well  
737 as the epigenetic literature in asthma corroborate the existence of these "genome by  
738 environment" interactions [23, 31-33], illustrating the utility of looking for pathway-pathway  
739 interactions beyond single pathway response effect that they reported. The pathway-pathway  
740 interaction screening can then be used to corroborate known biological phenomenon as well as  
741 potentially shed light on previously unknown interacting mechanisms.

## 742 **8 Limitations and Future Studies**

### 743 **8.1 Pushing towards more theoretical guarantees in machine learning**

744 The binomialRF technique framework provides a novel paradigm shift that can be extended into  
745 multiple directions. On one hand, binomialRF can be extended into a Bayesian framework by  
746 placing priors (the current implementation enforces an equal-weighted discrete uniform prior) on  
747 the likelihood of selecting a feature and determining significance using posterior probabilities on  
748 a beta-binomial process. On the other hand, the binomialRF algorithm can be extended into a  
749 binomialRF model averaging framework where candidate models comprised of feature subsets  
750 can be assessed and 'averaged' across. Similar to Bayesian Model Averaging (BMA)[34] and  
751 Sparsity Orientated Importance Learning (SOIL)[35], the binomialRF can weight candidate  
752 model based on its utility, however, in the model-free case, a likelihood-induced weighting is not

753 possible so we can alternatively weigh by out-of-bag (or validation) error. Since the model  
754 averaging data is composed of binomial random variable test statistics, future work will explore  
755 whether any asymptotic results occur if we let the number of candidate models go to infinity. At  
756 the moment, model averaging still requires arbitrary cutoffs (for our simulations studies  
757 experiments we used Proportion Selected  $> 0.9$  as our cutoffs) to make the final model selection,  
758 with empirical results suggesting it helps reduce false selection rate without sacrificing true  
759 feature coverage. However, these results are still empirical and offer no theoretical guarantees.  
760 We need stronger theoretical results to inform which cutoffs to use when considering a specific  
761 number of candidate models. Ideally, it would allow us to guarantee model selection results (as is  
762 the case with SOIL), however at the moment this is not guaranteed beyond a few empirical  
763 studies and will thus be explored in future studies.

## 764 8.2 **Improving interpretative power and translational utility: Incorporating pathways** 765 **and ontologies in feature selection**

766 On the other hand, as pathway-based biomarker studies gain more traction in the genomics realm  
767 [24, 36, 37], the machine learning community needs to continue developing domain-specific  
768 methods that can cater to the bioinformatics and genomics research community. These  
769 techniques must be further explored in order to improve the translational power and  
770 interpretation of machine learning results in bioinformatics. Too often we develop power  
771 predictive “black box” algorithms that lack explanation or interpretive power that is required to  
772 translate this information into knowledge. Therefore, future work must be prioritized in this  
773 direction. One possible direction to consider is ontology-enriched binomialRF models.  
774 Ontologies offer well-curated knowledge graphs that represent complex interplay of biological  
775 networks. Incorporating this information beforehand into the feature selection method, and later  
776 sending the results back into the ontology-domain for visualization can yield more interesting  
777 network-level analyses. Since feature selection in the binomialRF are composed of binomial  
778 distribution test statistics, there are numerous statistical possibilities with which one can enrich  
779 gene-based binomialRF predictions into aggregated pathway-level features. For example, one  
780 way would be to extend gene detection to ontology-based pathway-level analyses via over-  
781 representation tests from binomial test statistics. Another would incorporate gene ontology  
782 hierarchies between pathways to eliminate redundant signal and incorporate ontologies into  
783 smarter pathway detection. Model averaging can also be conducted by incorporating knowledge  
784 graphs to make the ‘candidate’ models more ontologically meaningful by looking at clusters of  
785 genes or pathways or identifying which elements dominate the signal in a biological process. We  
786 will explore these in future studies.

## 787 9 **Conclusion**

788 As the biomarker discovery process moves away from identifying single-gene products and  
789 moves towards interactions and pathways (say from gene ontologies like GO), the statistical  
790 machine learning community will need to continue to develop corresponding interpretable and  
791 scalable techniques. The binomialRF algorithm provides an early step in this direction in order to  
792 match the technical and computational requirements for these novel large-scale genomics  
793 analyses, as well as to extend to other ‘omics.

## 794 10 **List of acronyms**

- 795 • RF = random forest
- 796 • BH = Benjamini Hochberg adjustment
- 797 • BY = Benjamini Yekutieli adjustment
- 798 • BMA = Bayesian Model Averaging
- 799 • SOIL = Sparsity Oriented Importance Learning
- 800 • HRV = Human Rhinovirus
- 801 • FSR = False Selection Rate
- 802 • LASSO = Least Absolute Shrinkage and Selection Operator
- 803 • RAMP = regularization algorithm under marginality principle
- 804 • DTP = Dynamic Tree Programming
- 805 • GO = Gene Ontology
- 806 • GO-BP= Gene Ontology Biological Processes

807 11 **Conflict of Interest**

808 The authors declare no conflict of interest.

809 12 **Author Contributions**

810 SRZ conducted all the analyses in R; HHZ contributed to the statistical framework and analysis;  
811 all authors contributed to the evaluation and interpretation of the study; SRZ contributed to the  
812 figures and tables; SRZ, HHZ, CK, and YAL contributed to the writing of the manuscript; all  
813 authors read and approved the final manuscript.

814 13 **Funding**

815 This work was supported in part by The University of Arizona Health Sciences Center for  
816 Biomedical Informatics and Biostatistics, the BIO5 Institute, and the NIH (U01AI122275, NCI  
817 P30CA023074, 1UG3OD023171). This article did not receive sponsorship for publication.

818

819 **References**

820

- 821 1. Breiman, L., *Random forests*. Machine learning, 2001. **45**(1): p. 5-32.
- 822 2. Chen, X. and H. Ishwaran, *Random forests for genomic data analysis*. Genomics, 2012.  
823 **99**(6): p. 323-329.
- 824 3. Bienkowska, J.R., et al., *Convergent Random Forest predictor: methodology for*  
825 *predicting drug response from genome-scale data applied to anti-TNF response*.  
826 Genomics, 2009. **94**(6): p. 423-432.
- 827 4. Boulesteix, A.L., et al., *Overview of random forest methodology and practical guidance*  
828 *with emphasis on computational biology and bioinformatics*. Wiley Interdisciplinary  
829 Reviews: Data Mining and Knowledge Discovery, 2012. **2**(6): p. 493-507.
- 830 5. Diaz-Uriarte, R., *GeneSrF and varSelRF: a web-based tool and R package for gene*  
831 *selection and classification using random forest*. BMC bioinformatics, 2007. **8**(1): p. 328.
- 832 6. Díaz-Uriarte, R. and S.A. De Andres, *Gene selection and classification of microarray data*  
833 *using random forest*. BMC bioinformatics, 2006. **7**(1): p. 3.
- 834 7. Goldstein, B.A., et al., *An application of Random Forests to a genome-wide association*  
835 *dataset: methodological considerations & new findings*. BMC genetics, 2010. **11**(1): p.  
836 49.
- 837 8. Izmirlian, G., *Application of the random forest classification algorithm to a SELDI-TOF*  
838 *proteomics study in the setting of a cancer prevention trial*. Annals of the New York  
839 Academy of Sciences, 2004. **1020**(1): p. 154-174.
- 840 9. Jiang, P., et al., *MiPred: classification of real and pseudo microRNA precursors using*  
841 *random forest prediction model with combined features*. Nucleic acids research, 2007.  
842 **35**(suppl\_2): p. W339-W344.
- 843 10. Archer, K.J. and R.V. Kimes, *Empirical characterization of random forest variable*  
844 *importance measures*. Computational Statistics & Data Analysis, 2008. **52**(4): p. 2249-  
845 2260.

- 846 11. Genuer, R., J.-M. Poggi, and C. Tuleau-Malot, *VSURF: an R package for variable selection*  
847 *using random forests*. The R Journal, 2015. **7**(2): p. 19-33.
- 848 12. Szymczak, S., et al., *r2VIM: A new variable selection method for random forests in*  
849 *genome-wide association studies*. BioData mining, 2016. **9**(1): p. 7.
- 850 13. Kursa, M.B. and W.R. Rudnicki, *Feature selection with the Boruta package*. J Stat Softw,  
851 2010. **36**(11): p. 1-13.
- 852 14. Altmann, A., et al., *Permutation importance: a corrected feature importance measure*.  
853 Bioinformatics, 2010. **26**(10): p. 1340-1347.
- 854 15. Chipman, H.A., E.I. George, and R.E. McCulloch, *BART: Bayesian additive regression*  
855 *trees*. The Annals of Applied Statistics, 2010. **4**(1): p. 266-298.
- 856 16. Tibshirani, R., *Regression shrinkage and selection via the lasso*. Journal of the Royal  
857 Statistical Society: Series B (Methodological), 1996. **58**(1): p. 267-288.
- 858 17. Zou, H. and T. Hastie, *Regularization and variable selection via the elastic net*. Journal of  
859 the royal statistical society: series B (statistical methodology), 2005. **67**(2): p. 301-320.
- 860 18. Meier, L., S. Van De Geer, and P. Bühlmann, *The group lasso for logistic regression*.  
861 Journal of the Royal Statistical Society: Series B (Statistical Methodology), 2008. **70**(1): p.  
862 53-71.
- 863 19. Liaw, A. and M. Wiener, *Classification and regression by randomForest*. R news, 2002.  
864 **2**(3): p. 18-22.
- 865 20. Benjamini, Y. and Y. Hochberg, *Controlling the false discovery rate: a practical and*  
866 *powerful approach to multiple testing*. Journal of the Royal statistical society: series B  
867 (Methodological), 1995. **57**(1): p. 289-300.
- 868 21. Benjamini, Y. and D. Yekutieli, *The control of the false discovery rate in multiple testing*  
869 *under dependency*. The annals of statistics, 2001. **29**(4): p. 1165-1188.
- 870 22. Zaas, A.K., et al., *Gene expression signatures diagnose influenza and other symptomatic*  
871 *respiratory viral infections in humans*. Cell host & microbe, 2009. **6**(3): p. 207-217.
- 872 23. Gardeux, V., et al., *A genome-by-environment interaction classifier for precision*  
873 *medicine: personal transcriptome response to rhinovirus identifies children prone to*  
874 *asthma exacerbations*. Journal of the American Medical Informatics Association, 2017.  
875 **24**(6): p. 1116-1126.
- 876 24. Gardeux, V., et al., *'N-of-1-pathways' unveils personal deregulated mechanisms from a*  
877 *single pair of RNA-Seq samples: towards precision medicine*. Journal of the American  
878 Medical Informatics Association, 2014. **21**(6): p. 1015-1025.
- 879 25. Nelder, J.A., *The selection of terms in response-surface models—how strong is the weak-*  
880 *heredity principle?* The American Statistician, 1998. **52**(4): p. 315-318.
- 881 26. Choi, N.H., W. Li, and J. Zhu, *Variable selection with the strong heredity constraint and*  
882 *its oracle property*. Journal of the American Statistical Association, 2010. **105**(489): p.  
883 354-364.
- 884 27. Hao, N., Y. Feng, and H.H. Zhang, *Model selection for high-dimensional quadratic*  
885 *regression via regularization*. Journal of the American Statistical Association, 2018.  
886 **113**(522): p. 615-625.
- 887 28. Martino, D. and S. Prescott, *Epigenetics and prenatal influences on asthma and allergic*  
888 *airways disease*. Chest, 2011. **139**(3): p. 640-647.

- 889 29. Yang, I.V. and D.A. Schwartz, *Epigenetic mechanisms and the development of asthma*.  
890 Journal of allergy and clinical immunology, 2012. **130**(6): p. 1243-1255.
- 891 30. McErlean, P., et al., *Human rhinovirus infection causes different DNA methylation*  
892 *changes in nasal epithelial cells from healthy and asthmatic subjects*. BMC medical  
893 genomics, 2014. **7**(1): p. 37.
- 894 31. Kidd, C.D., et al., *Histone modifications and asthma. the interface of the epigenetic and*  
895 *genetic landscapes*. American journal of respiratory cell and molecular biology, 2016.  
896 **54**(1): p. 3-12.
- 897 32. Miller, R.L. and S.-m. Ho, *Environmental epigenetics and asthma: current concepts and*  
898 *call for studies*. American journal of respiratory and critical care medicine, 2008. **177**(6):  
899 p. 567-573.
- 900 33. Bégin, P. and K.C. Nadeau, *Epigenetic regulation of asthma and allergic disease*. Allergy,  
901 Asthma & Clinical Immunology, 2014. **10**(1): p. 27.
- 902 34. Hoeting, J.A., et al., *Bayesian model averaging: a tutorial*. Statistical science, 1999: p.  
903 382-401.
- 904 35. Ye, C., Y. Yang, and Y. Yang, *Sparsity Oriented Importance Learning for High-Dimensional*  
905 *Linear Regression*. Journal of the American Statistical Association, 2018. **113**(524): p.  
906 1797-1812.
- 907 36. Zaim, S.R., et al., *Evaluating single-subject study methods for personal transcriptomic*  
908 *interpretations to advance precision medicine*. bioRxiv, 2018: p. 428581.
- 909 37. Zaim, S.R., et al. *Emergence of pathway-level composite biomarkers from converging*  
910 *gene set signals of heterogeneous transcriptomic responses*. in *Pac. Symp. Biocomput.*  
911 2018. World Scientific.
- 912
- 913



914 14 **Appendix**

915 **A1: binomialRF Feature Selection Algorithm**

916

917 Let  $F_{j,z}$  denote the random variable measuring whether  $X_j$  is selected as the splitting variable for  
 918 the root at the root of a tree  $T_i$ ,

919

$$F_{j,z} = \begin{cases} 1, & \text{if } \text{root}(T_i) = X_j \\ 0, & \text{otherwise.} \end{cases} \quad (1)$$

920

921 This results in  $F_{j,z}$  being a Bernoulli random variable,  $F_{j,z} \sim \text{Bern}(p_{\text{root}})$ , and  $F_j = \sum_{z=1}^V F_{j,z} \sim$   
 922  $\text{Binomial}(V, p_{\text{root}})$  is a Binomial random variable across all  $V$  trees, where  $\mathbf{p}_{\text{root}}$  is the  
 923 probability of randomly selecting a feature  $X_j$  as the optimal splitting variable in the root of tree  
 924  $T_i$ .  $\mathbf{p}_{\text{root}}$  is given by

925

$$p_{\text{root}} = 1 - \left( \prod_{g=1}^m \frac{P-g}{P-(g-1)} \left( \frac{1}{m} \right) \right)$$

926

927 Under the null,  $p_{\text{root}}$  is constant across all trees. The binomialRF feature selection algorithm  
 928 below illustrates the process of identifying main effects for the binomialRF algorithm.

929

---

**Algorithm 1** binomialRF feature selection

---

calculate  $p_{\text{root}} = \frac{1}{m} \left[ 1 - \prod_{g=1}^m \frac{P-g}{P-(g-1)} \right]$

for  $z=1:V$  do

- Grow the  $z^{\text{th}}$  decision tree in the random forest,  $T_z$ .
- Observe the  $X_{\text{optimal}}$  splitting variable at the root of  $T_z$
- construct  $F_{j,z}$

$$\text{where } F_{j,z} = \begin{cases} 1 & X_{\text{optimal}} = X_j \text{ for } \text{root}(T_z) \\ 0 & \text{otherwise} \end{cases}$$

end for

- Test Hypothesis  $H_0 : Pr(X_j) \leq p_{\text{root}}$   $H_A : Pr(X_j) > p_{\text{root}}$
  - $F_j = \sum_{z=1}^V F_{j,z} \sim \text{Binomial}(V, p_{\text{root}})$
  - Rejection Region  $R = \{X_j : F_j < Q_{\alpha}(V, p_{\text{root}})\}$
- 

930

931

932 To generalize to identify  $K$ -set interactions, denoted by  $\otimes X_{i=1}^K$ , replace  $F_{j,z}$  with

933

$$F_{\otimes X_{i=1}^K, z} = \begin{cases} 1 & \{X_i\}_{i \in K} \\ 0 & \text{otherwise} \end{cases},$$

935

936 where  $\{X_i\}_{i \in K}$  denotes the interaction sequence. Then replace  $p_{\text{root}}$  with

937

$$938 \quad p_{K\text{-way}} = \frac{1}{2^{K-1}} \prod_{k=1}^K \left( 1 - \left( \prod_{g=1}^m \frac{(L-k)-g}{(L-k)-(g-1)} \binom{1}{m} \right) \right).$$

939

940 Then,  $F_{\otimes_{i=1}^K} = \sum_{z=1}^V F_{\mathbf{X}_{\otimes,z}^K} \sim \text{Binomial}(V, p_{K\text{-way}})$ , and the hypothesis test follows from  
941 this.

942

943

## 944 **A2: climbToRoot (DTP) Algorithm**

945

946 Note, in binary split trees, the nodes are ordered such that each the label of each left daughter  
947 node is twice the label of its parent node, and the label of each right daughter -1 is twice the label  
948 of its parent node. Under this such ordering, the  $K_{\text{terminal}}$  nodes are identified as  $K_{\text{terminal}} =$   
949  $\{2^{K-1}: (2^K - 1)\}$ , and lines 20-23 are required for cases when true terminal (leaf) nodes occur  
950 before the  $K_{\text{terminal}}$  nodes.

951

```
952 3. climbToRoot <- function(final.node, Tree, K) {  
953 4.  
954 5.   Tree = as.data.frame(Tree)  
955 6.   path <- c(final.node)  
956 7.  
957 8.   while(final.node != 1){  
958 9.     if(final.node %% 2 == 0){  
959 10.    new.parent <- which(Tree[, 'left daughter'] == final.node)  
960 11.    path <- c(path, new.parent)  
961 12.    final.node <- new.parent  
962 13.  
963 14.    } else if(final.node %% 2 != 0){  
964 15.    new.parent <- which(Tree[, 'right daughter'] == final.node)  
965 16.    path <- c(path, new.parent)  
966 17.    final.node <- new.parent  
967 18.    }  
968 19.  
969 20.  }  
970 21.  
971 22.  if(length(path) > K){  
972 23.    new.path <- rev(path)[-1]  
973 24.  
974 25.    return(new.path)  
975 26.  
976 27.  } else {  
977 28.    return(path)  
978 29.  }  
979 30. }
```

980

## 981 **A3. Asthma Validation study validation: Predicted Pathways by binomialRF**

982

983 The table below compares our Asthma Validation study to the original classifier obtained by  
984 Gardeux et al's random forest classifier. The pathways below are the ones determined  
985 significant by the binomialRF algorithm. The first two columns show the GO pathway identifier  
986 and description. The third one determines whether it was validated in the HRV by Gardeux, and

987 the last column corresponds to their 5 distinct pathway classes. As seen by some of the pathways  
 988 not validated in the HRV study, (e.g., “GO:0001763”) even though they were not part of the  
 989 original discoveries, they correspond to the Class III “Morphogenesis” pathways, thus  
 990 identifying physiologically relevant and related candidate pathway discoveries.  
 991

| <b>Pathway</b> | <b>Freq.</b> | <b>Pvalue</b>             | <b>FDR</b>             | <b>description</b>                                   |
|----------------|--------------|---------------------------|------------------------|------------------------------------------------------|
| GO:0016570     | 823          | Pvalue < 10 <sup>-6</sup> | FDR < 10 <sup>-6</sup> | histone modification                                 |
| GO:0016569     | 221          | Pvalue < 10 <sup>-6</sup> | FDR < 10 <sup>-6</sup> | covalent chromatin modification                      |
| GO:0045087     | 197          | Pvalue < 10 <sup>-6</sup> | FDR < 10 <sup>-6</sup> | innate immune response                               |
| GO:0034340     | 129          | Pvalue < 10 <sup>-6</sup> | FDR < 10 <sup>-6</sup> | response to type I interferon                        |
| GO:0060337     | 124          | Pvalue < 10 <sup>-6</sup> | FDR < 10 <sup>-6</sup> | type I interferon-mediated signaling pathway         |
| GO:0071357     | 122          | Pvalue < 10 <sup>-6</sup> | FDR < 10 <sup>-6</sup> | cellular response to type I interferon               |
| GO:0016568     | 78           | Pvalue < 10 <sup>-6</sup> | FDR < 10 <sup>-6</sup> | chromatin modification                               |
| GO:0006913     | 68           | Pvalue < 10 <sup>-6</sup> | FDR < 10 <sup>-6</sup> | nucleocytoplasmic transport                          |
| GO:0007017     | 60           | Pvalue < 10 <sup>-6</sup> | FDR < 10 <sup>-6</sup> | microtubule-based process                            |
| GO:0006325     | 57           | Pvalue < 10 <sup>-6</sup> | FDR < 10 <sup>-6</sup> | chromatin organization                               |
| GO:0006954     | 48           | Pvalue < 10 <sup>-6</sup> | FDR < 10 <sup>-6</sup> | inflammatory response                                |
| GO:0051028     | 46           | Pvalue < 10 <sup>-6</sup> | FDR < 10 <sup>-6</sup> | mRNA transport                                       |
| GO:0009617     | 41           | Pvalue < 10 <sup>-6</sup> | FDR < 10 <sup>-6</sup> | response to bacterium                                |
| GO:0060688     | 32           | Pvalue < 10 <sup>-6</sup> | FDR < 10 <sup>-6</sup> | regulation of morphogenesis of a branching structure |
| GO:0007565     | 31           | Pvalue < 10 <sup>-6</sup> | FDR < 10 <sup>-6</sup> | female pregnancy                                     |
| GO:0009615     | 29           | Pvalue < 10 <sup>-6</sup> | FDR < 10 <sup>-6</sup> | response to virus                                    |
| GO:0045814     | 28           | Pvalue < 10 <sup>-6</sup> | FDR < 10 <sup>-6</sup> | negative regulation of gene expression, epigenetic   |
| GO:0097028     | 28           | Pvalue < 10 <sup>-6</sup> | FDR < 10 <sup>-6</sup> | dendritic cell differentiation                       |
| GO:0048568     | 27           | Pvalue < 10 <sup>-6</sup> | FDR < 10 <sup>-6</sup> | embryonic organ development                          |
| GO:0009581     | 26           | Pvalue < 10 <sup>-6</sup> | FDR < 10 <sup>-6</sup> | detection of external stimulus                       |
| GO:0042274     | 26           | Pvalue < 10 <sup>-6</sup> | FDR < 10 <sup>-6</sup> | ribosomal small subunit biogenesis                   |
| GO:0050900     | 25           | Pvalue < 10 <sup>-6</sup> | FDR < 10 <sup>-6</sup> | leukocyte migration                                  |
| GO:0051272     | 23           | Pvalue < 10 <sup>-6</sup> | FDR < 10 <sup>-6</sup> | positive regulation of cellular component movement   |
| GO:0046888     | 21           | Pvalue < 10 <sup>-6</sup> | FDR < 10 <sup>-6</sup> | negative regulation of hormone secretion             |
| GO:0006342     | 17           | Pvalue < 10 <sup>-6</sup> | FDR < 10 <sup>-6</sup> | chromatin silencing                                  |
| GO:0007050     | 16           | Pvalue < 10 <sup>-6</sup> | FDR < 10 <sup>-6</sup> | cell cycle arrest                                    |
| GO:0000226     | 15           | Pvalue < 10 <sup>-6</sup> | FDR < 10 <sup>-6</sup> | microtubule cytoskeleton organization                |
| GO:0006260     | 15           | Pvalue < 10 <sup>-6</sup> | FDR < 10 <sup>-6</sup> | DNA replication                                      |
| GO:0048638     | 15           | Pvalue < 10 <sup>-6</sup> | FDR < 10 <sup>-6</sup> | regulation of developmental growth                   |

|            |    |                           |                       |                                                                    |
|------------|----|---------------------------|-----------------------|--------------------------------------------------------------------|
| GO:0006813 | 14 | Pvalue < 10 <sup>-6</sup> | FDR< 10 <sup>-6</sup> | potassium ion transport                                            |
| GO:0051169 | 13 | Pvalue < 10 <sup>-6</sup> | FDR< 10 <sup>-6</sup> | nuclear transport                                                  |
| GO:0051606 | 13 | Pvalue < 10 <sup>-6</sup> | FDR< 10 <sup>-6</sup> | detection of stimulus                                              |
| GO:0006363 | 12 | Pvalue < 10 <sup>-6</sup> | FDR< 10 <sup>-6</sup> | termination of RNA polymerase I transcription                      |
| GO:0034341 | 12 | Pvalue < 10 <sup>-6</sup> | FDR< 10 <sup>-6</sup> | response to interferon-gamma                                       |
| GO:0050851 | 12 | Pvalue < 10 <sup>-6</sup> | FDR< 10 <sup>-6</sup> | antigen receptor-mediated signaling pathway                        |
| GO:0008015 | 11 | Pvalue < 10 <sup>-6</sup> | FDR< 10 <sup>-6</sup> | blood circulation                                                  |
| GO:0001763 | 10 | Pvalue < 10 <sup>-6</sup> | FDR< 10 <sup>-6</sup> | morphogenesis of a branching structure                             |
| GO:0043966 | 10 | Pvalue < 10 <sup>-6</sup> | FDR< 10 <sup>-6</sup> | histone H3 acetylation                                             |
| GO:0050853 | 10 | Pvalue < 10 <sup>-6</sup> | FDR< 10 <sup>-6</sup> | B cell receptor signaling pathway                                  |
| GO:0051216 | 10 | Pvalue < 10 <sup>-6</sup> | FDR< 10 <sup>-6</sup> | cartilage development                                              |
| GO:0060038 | 10 | Pvalue < 10 <sup>-6</sup> | FDR< 10 <sup>-6</sup> | cardiac muscle cell proliferation                                  |
| GO:0007423 | 9  | Pvalue < 10 <sup>-6</sup> | FDR< 10 <sup>-6</sup> | sensory organ development                                          |
| GO:0019221 | 9  | Pvalue < 10 <sup>-6</sup> | FDR< 10 <sup>-6</sup> | cytokine-mediated signaling pathway                                |
| GO:0050807 | 9  | Pvalue < 10 <sup>-6</sup> | FDR< 10 <sup>-6</sup> | regulation of synapse organization                                 |
| GO:0001658 | 8  | Pvalue < 10 <sup>-6</sup> | 0.000053              | branching involved in ureteric bud morphogenesis                   |
| GO:0006361 | 8  | Pvalue < 10 <sup>-6</sup> | .000053               | transcription initiation from RNA polymerase I promoter            |
| GO:0006473 | 8  | Pvalue < 10 <sup>-6</sup> | .000053               | protein acetylation                                                |
| GO:0007586 | 8  | Pvalue < 10 <sup>-6</sup> | .000053               | digestion                                                          |
| GO:0043484 | 8  | Pvalue < 10 <sup>-6</sup> | .000053               | regulation of RNA splicing                                         |
| GO:0001890 | 7  | 0.000081                  | 0.00041               | placenta development                                               |
| GO:0002768 | 7  | 0.000081                  | 0.00041               | immune response-regulating cell surface receptor signaling pathway |
| GO:2000027 | 7  | 0.000081                  | 0.00041               | regulation of organ morphogenesis                                  |
| GO:0000722 | 6  | 0.00058                   | 0.0026                | telomere maintenance via recombination                             |
| GO:0002429 | 6  | 0.00058                   | 0.0026                | immune response-activating cell surface receptor signaling pathway |
| GO:0043279 | 6  | 0.00058                   | 0.0026                | response to alkaloid                                               |
| GO:0060326 | 6  | 0.00058                   | 0.0026                | cell chemotaxis                                                    |
| GO:0060351 | 6  | 0.00058                   | 0.0026                | cartilage development involved in endochondral bone morphogenesis  |
| GO:0070925 | 6  | 0.00058                   | 0.0026                | organelle assembly                                                 |
| GO:0000910 | 5  | 0.0036                    | 0.014                 | cytokinesis                                                        |

|            |   |        |       |                                      |
|------------|---|--------|-------|--------------------------------------|
| GO:0007600 | 5 | 0.0036 | 0.014 | sensory perception                   |
| GO:0018105 | 5 | 0.0036 | 0.014 | peptidyl-serine phosphorylation      |
| GO:0018205 | 5 | 0.0036 | 0.014 | peptidyl-lysine modification         |
| GO:0035337 | 5 | 0.0036 | 0.014 | fatty-acyl-CoA metabolic process     |
| GO:0044057 | 5 | 0.0036 | 0.014 | regulation of system process         |
| GO:0046949 | 5 | 0.0036 | 0.014 | fatty-acyl-CoA biosynthetic process  |
| GO:0050795 | 5 | 0.0036 | 0.014 | regulation of behavior               |
| GO:0050953 | 5 | 0.0036 | 0.014 | sensory perception of light stimulus |

992

993

994

995

996 **A4. binomialRF Model Averaging in Asthma Validation Study**  
 997

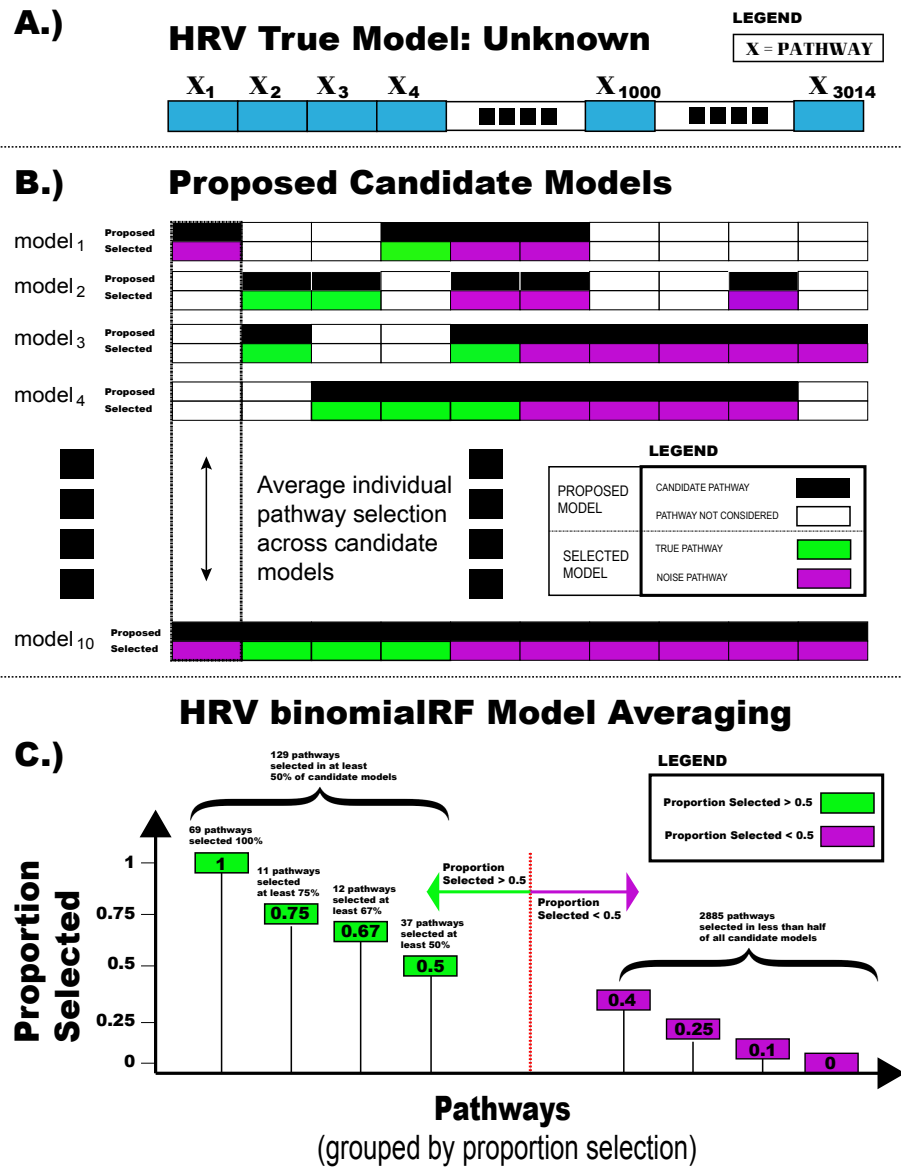

**Supplemental Figure A4: Model Averaging in the Asthma Validation Study.** In contrast to the simulation example in Section 2.7, in the Asthma Validation study the “true” model is not known therefore, (A) is unknown, and we use the model averaging framework (B) to make the most educated guess as to which pathways are significant. Out of the 3,014 pathways expressed from the GO-BP ontology, 129 pathways were selected via model averaging and these were used to estimate the validation accuracy in the pediatric asthma validation cohort (C).

998  
 999  
 1000

**A5. Pathway-Pathway Interactions in Asthma Validation Study**

| Pathway1 | Pathway2 | Adj.Pval | Description Pathway 1 | Description Pathway 2 |
|----------|----------|----------|-----------------------|-----------------------|
|----------|----------|----------|-----------------------|-----------------------|

|            |            |                        |                                              |                                                      |
|------------|------------|------------------------|----------------------------------------------|------------------------------------------------------|
| GO:0016570 | GO:0009581 | FDR < 10 <sup>-6</sup> | histone modification                         | detection of external stimulus                       |
| GO:0016570 | GO:0007423 | FDR < 10 <sup>-6</sup> | histone modification                         | sensory organ development                            |
| GO:0016570 | GO:0001763 | FDR < 10 <sup>-6</sup> | histone modification                         | morphogenesis of a branching structure               |
| GO:0016570 | GO:0048568 | FDR < 10 <sup>-6</sup> | histone modification                         | embryonic organ development                          |
| GO:0016570 | GO:0006184 | FDR < 10 <sup>-6</sup> | histone modification                         | GTP catabolic process                                |
| GO:0016570 | GO:0009164 | FDR < 10 <sup>-6</sup> | histone modification                         | nucleoside catabolic process                         |
| GO:0016570 | GO:0009615 | FDR < 10 <sup>-6</sup> | histone modification                         | response to virus                                    |
| GO:0071357 | GO:0097028 | FDR < 10 <sup>-6</sup> | cellular response to type I interferon       | dendritic cell differentiation                       |
| GO:0045087 | GO:0097028 | FDR < 10 <sup>-6</sup> | innate immune response                       | dendritic cell differentiation                       |
| GO:0045087 | GO:0046949 | FDR < 10 <sup>-6</sup> | innate immune response                       | fatty-acyl-CoA biosynthetic process                  |
| GO:0016570 | GO:0051272 | FDR < 10 <sup>-6</sup> | histone modification                         | positive regulation of cellular component movement   |
| GO:0034340 | GO:0046949 | FDR < 10 <sup>-6</sup> | response to type I interferon                | fatty-acyl-CoA biosynthetic process                  |
| GO:0016570 | GO:0050795 | FDR < 10 <sup>-6</sup> | histone modification                         | regulation of behavior                               |
| GO:0060337 | GO:0046949 | FDR < 10 <sup>-6</sup> | type I interferon-mediated signaling pathway | fatty-acyl-CoA biosynthetic process                  |
| GO:0016570 | GO:2000027 | FDR < 10 <sup>-6</sup> | histone modification                         | regulation of organ morphogenesis                    |
| GO:0016569 | GO:0060688 | FDR < 10 <sup>-6</sup> | covalent chromatin modification              | regulation of morphogenesis of a branching structure |
| GO:0016570 | GO:0060038 | FDR < 10 <sup>-6</sup> | histone modification                         | cardiac muscle cell proliferation                    |
| GO:0016570 | GO:0043279 | FDR < 10 <sup>-6</sup> | histone modification                         | response to alkaloid                                 |
| GO:0016570 | GO:0060688 | FDR < 10 <sup>-6</sup> | histone modification                         | regulation of morphogenesis of a branching structure |
| GO:0060337 | GO:0097028 | FDR < 10 <sup>-6</sup> | type I interferon-mediated signaling pathway | dendritic cell differentiation                       |
| GO:0016569 | GO:0051216 | FDR < 10 <sup>-6</sup> | covalent chromatin modification              | cartilage development                                |
| GO:0016569 | GO:0007423 | FDR < 10 <sup>-6</sup> | covalent chromatin modification              | sensory organ development                            |
| GO:0034340 | GO:0097028 | FDR < 10 <sup>-6</sup> | response to type I interferon                | dendritic cell differentiation                       |
| GO:0016569 | GO:0051272 | FDR < 10 <sup>-6</sup> | covalent chromatin modification              | positive regulation of cellular component movement   |
| GO:0016569 | GO:0006184 | FDR < 10 <sup>-6</sup> | covalent chromatin modification              | GTP catabolic process                                |
| GO:0016570 | GO:0046888 | FDR < 10 <sup>-6</sup> | histone modification                         | negative regulation of hormone secretion             |
| GO:0016570 | GO:0051216 | FDR < 10 <sup>-6</sup> | histone modification                         | cartilage development                                |
| GO:0016570 | GO:0001658 | FDR < 10 <sup>-6</sup> | histone modification                         | branching involved in ureteric bud morphogenesis     |

|            |            |                        |                                                      |                                                         |
|------------|------------|------------------------|------------------------------------------------------|---------------------------------------------------------|
| GO:0016569 | GO:0006813 | FDR < 10 <sup>-6</sup> | covalent chromatin modification                      | potassium ion transport                                 |
| GO:0016570 | GO:0006813 | FDR < 10 <sup>-6</sup> | histone modification                                 | potassium ion transport                                 |
| GO:0016569 | GO:0060038 | FDR < 10 <sup>-6</sup> | covalent chromatin modification                      | cardiac muscle cell proliferation                       |
| GO:0045087 | GO:0050853 | FDR < 10 <sup>-6</sup> | innate immune response                               | B cell receptor signaling pathway                       |
| GO:0016569 | GO:0001763 | FDR < 10 <sup>-6</sup> | covalent chromatin modification                      | morphogenesis of a branching structure                  |
| GO:0016568 | GO:0046949 | FDR < 10 <sup>-6</sup> | chromatin modification                               | fatty-acyl-CoA biosynthetic process                     |
| GO:0016569 | GO:0009164 | FDR < 10 <sup>-6</sup> | covalent chromatin modification                      | nucleoside catabolic process                            |
| GO:0016570 | GO:0006325 | FDR < 10 <sup>-6</sup> | histone modification                                 | chromatin organization                                  |
| GO:0016568 | GO:0097028 | FDR < 10 <sup>-6</sup> | chromatin modification                               | dendritic cell differentiation                          |
| GO:0016569 | GO:0007565 | FDR < 10 <sup>-6</sup> | covalent chromatin modification                      | female pregnancy                                        |
| GO:0016570 | GO:0007565 | FDR < 10 <sup>-6</sup> | histone modification                                 | female pregnancy                                        |
| GO:0097028 | GO:0045814 | 1.62E-05               | dendritic cell differentiation                       | negative regulation of gene expression, epigenetic      |
| GO:0016569 | GO:2000027 | 1.62E-05               | covalent chromatin modification                      | regulation of organ morphogenesis                       |
| GO:0009617 | GO:0006363 | 1.62E-05               | response to bacterium                                | termination of RNA polymerase I transcription           |
| GO:0071357 | GO:0046949 | 1.62E-05               | cellular response to type I interferon               | fatty-acyl-CoA biosynthetic process                     |
| GO:0016569 | GO:0048568 | 1.62E-05               | covalent chromatin modification                      | embryonic organ development                             |
| GO:0045087 | GO:0006361 | 1.62E-05               | innate immune response                               | transcription initiation from RNA polymerase I promoter |
| GO:0016570 | GO:0071357 | 1.55E-04               | histone modification                                 | cellular response to type I interferon                  |
| GO:0016569 | GO:0009581 | 1.55E-04               | covalent chromatin modification                      | detection of external stimulus                          |
| GO:0071357 | GO:0050853 | 1.55E-04               | cellular response to type I interferon               | B cell receptor signaling pathway                       |
| GO:0045087 | GO:0006363 | 1.55E-04               | innate immune response                               | termination of RNA polymerase I transcription           |
| GO:0006913 | GO:0046949 | 1.55E-04               | nucleocytoplasmic transport                          | fatty-acyl-CoA biosynthetic process                     |
| GO:0007017 | GO:0016568 | 1.55E-04               | microtubule-based process                            | chromatin modification                                  |
| GO:0097028 | GO:0009615 | 1.55E-04               | dendritic cell differentiation                       | response to virus                                       |
| GO:0000722 | GO:0046949 | 1.35E-03               | telomere maintenance via recombination               | fatty-acyl-CoA biosynthetic process                     |
| GO:0060688 | GO:0046949 | 1.35E-03               | regulation of morphogenesis of a branching structure | fatty-acyl-CoA biosynthetic process                     |



|            |            |          |                                                                    |                                                         |
|------------|------------|----------|--------------------------------------------------------------------|---------------------------------------------------------|
| GO:0007017 | GO:0009615 | 1.35E-03 | microtubule-based process                                          | response to virus                                       |
| GO:0009617 | GO:0046949 | 1.35E-03 | response to bacterium                                              | fatty-acyl-CoA biosynthetic process                     |
| GO:0007017 | GO:0006913 | 1.35E-03 | microtubule-based process                                          | nucleocytoplasmic transport                             |
| GO:0034340 | GO:0048568 | 1.35E-03 | response to type I interferon                                      | embryonic organ development                             |
| GO:0007017 | GO:0060688 | 8.37E-03 | microtubule-based process                                          | regulation of morphogenesis of a branching structure    |
| GO:0045087 | GO:0060688 | 8.37E-03 | innate immune response                                             | regulation of morphogenesis of a branching structure    |
| GO:0006954 | GO:0097028 | 8.37E-03 | inflammatory response                                              | dendritic cell differentiation                          |
| GO:0007017 | GO:0043279 | 8.37E-03 | microtubule-based process                                          | response to alkaloid                                    |
| GO:0006325 | GO:0050853 | 8.37E-03 | chromatin organization                                             | B cell receptor signaling pathway                       |
| GO:0007017 | GO:0009164 | 8.37E-03 | microtubule-based process                                          | nucleoside catabolic process                            |
| GO:0009617 | GO:0097028 | 8.37E-03 | response to bacterium                                              | dendritic cell differentiation                          |
| GO:0006325 | GO:0006363 | 8.37E-03 | chromatin organization                                             | termination of RNA polymerase I transcription           |
| GO:0006913 | GO:0097028 | 8.37E-03 | nucleocytoplasmic transport                                        | dendritic cell differentiation                          |
| GO:0060337 | GO:0006361 | 8.37E-03 | type I interferon-mediated signaling pathway                       | transcription initiation from RNA polymerase I promoter |
| GO:0006342 | GO:0046949 | 8.37E-03 | chromatin silencing                                                | fatty-acyl-CoA biosynthetic process                     |
| GO:0016569 | GO:0050807 | 8.37E-03 | covalent chromatin modification                                    | regulation of synapse organization                      |
| GO:0051028 | GO:0046949 | 8.37E-03 | mRNA transport                                                     | fatty-acyl-CoA biosynthetic process                     |
| GO:0007017 | GO:0051169 | 8.37E-03 | microtubule-based process                                          | nuclear transport                                       |
| GO:0007017 | GO:0051272 | 8.37E-03 | microtubule-based process                                          | positive regulation of cellular component movement      |
| GO:0002768 | GO:0046949 | 8.37E-03 | immune response-regulating cell surface receptor signaling pathway | fatty-acyl-CoA biosynthetic process                     |
| GO:0060337 | GO:0034340 | 8.37E-03 | type I interferon-mediated signaling pathway                       | response to type I interferon                           |
| GO:0097028 | GO:0006342 | 8.37E-03 | dendritic cell differentiation                                     | chromatin silencing                                     |
| GO:0097028 | GO:2000027 | 8.37E-03 | dendritic cell differentiation                                     | regulation of organ morphogenesis                       |
| GO:0016568 | GO:0046888 | 8.37E-03 | chromatin modification                                             | negative regulation of hormone secretion                |
| GO:0016568 | GO:0009581 | 4.28E-02 | chromatin modification                                             | detection of external stimulus                          |

|            |            |          |                                                    |                                                         |
|------------|------------|----------|----------------------------------------------------|---------------------------------------------------------|
| GO:0097028 | GO:0046949 | 4.28E-02 | dendritic cell differentiation                     | fatty-acyl-CoA biosynthetic process                     |
| GO:0016569 | GO:0007050 | 4.28E-02 | covalent chromatin modification                    | cell cycle arrest                                       |
| GO:0009581 | GO:0007050 | 4.28E-02 | detection of external stimulus                     | cell cycle arrest                                       |
| GO:0007050 | GO:0001763 | 4.28E-02 | cell cycle arrest                                  | morphogenesis of a branching structure                  |
| GO:0050852 | GO:0046949 | 4.28E-02 | T cell receptor signaling pathway                  | fatty-acyl-CoA biosynthetic process                     |
| GO:0016569 | GO:0043279 | 4.28E-02 | covalent chromatin modification                    | response to alkaloid                                    |
| GO:0016569 | GO:0009615 | 4.28E-02 | covalent chromatin modification                    | response to virus                                       |
| GO:0071357 | GO:0006361 | 4.28E-02 | cellular response to type I interferon             | transcription initiation from RNA polymerase I promoter |
| GO:0060337 | GO:0006363 | 4.28E-02 | type I interferon-mediated signaling pathway       | termination of RNA polymerase I transcription           |
| GO:0006325 | GO:0007565 | 4.28E-02 | chromatin organization                             | female pregnancy                                        |
| GO:0006325 | GO:0009617 | 4.28E-02 | chromatin organization                             | response to bacterium                                   |
| GO:0045814 | GO:0006363 | 4.28E-02 | negative regulation of gene expression, epigenetic | termination of RNA polymerase I transcription           |
| GO:0006913 | GO:0050853 | 4.28E-02 | nucleocytoplasmic transport                        | B cell receptor signaling pathway                       |
| GO:0034340 | GO:0009145 | 4.28E-02 | response to type I interferon                      | purine nucleoside triphosphate biosynthetic process     |
| GO:0034340 | GO:0050853 | 4.28E-02 | response to type I interferon                      | B cell receptor signaling pathway                       |
| GO:0006342 | GO:0006361 | 4.28E-02 | chromatin silencing                                | transcription initiation from RNA polymerase I promoter |
| GO:0006325 | GO:0046888 | 4.28E-02 | chromatin organization                             | negative regulation of hormone secretion                |
| GO:0046949 | GO:0050795 | 4.28E-02 | fatty-acyl-CoA biosynthetic process                | regulation of behavior                                  |
| GO:0009615 | GO:0050853 | 4.28E-02 | response to virus                                  | B cell receptor signaling pathway                       |
| GO:0071357 | GO:0008015 | 4.28E-02 | cellular response to type I interferon             | blood circulation                                       |
| GO:0006325 | GO:0009164 | 4.28E-02 | chromatin organization                             | nucleoside catabolic process                            |
| GO:0060337 | GO:0009145 | 4.28E-02 | type I interferon-mediated signaling pathway       | purine nucleoside triphosphate biosynthetic process     |
| GO:0016569 | GO:0050795 | 4.28E-02 | covalent chromatin modification                    | regulation of behavior                                  |
| GO:0007050 | GO:0051216 | 4.28E-02 | cell cycle arrest                                  | cartilage development                                   |
| GO:0006260 | GO:0001763 | 4.28E-02 | DNA replication                                    | morphogenesis of a branching structure                  |
| GO:0050807 | GO:0046949 | 4.28E-02 | regulation of synapse organization                 | fatty-acyl-CoA biosynthetic process                     |

|            |            |          |                               |                                                         |
|------------|------------|----------|-------------------------------|---------------------------------------------------------|
| GO:0034340 | GO:0006361 | 4.28E-02 | response to type I interferon | transcription initiation from RNA polymerase I promoter |
| GO:0007565 | GO:0046888 | 4.28E-02 | female pregnancy              | negative regulation of hormone secretion                |

1001
